# Supplementary material for: Distinct and targetable role of calcium-sensing receptor in leukaemia
Source: PubMed Central journal article supplement (PMC10558580; doi:10.1038/s41467-023-41770-0), 2023-10-06
Supplement: 41467_2023_41770_MOESM1_ESM.pdf [file 41467_2023_41770_MOESM1_ESM.pdf]

# **Supplementary Information**

## **Distinct and targetable role of calcium sensing receptor in leukaemia**

Raquel S. Pereira, Rahul Kumar, Alessia Cais, Lara Paulini, Alisa Kahler, Jimena Bravo, Valentina R. Minciacchi, Theresa Krack, Eric Kowarz, Costanza Zanetti, Parimala Sonika Godavarthy, Fabian Hoeller, Pablo Llavona, Tabea Stark, Georg Tascher, Daniel Nowak, Eshwar Meduri, Brian J. P. Huntly, Christian Münch, Francesco Pampaloni, Rolf Marschalek, Daniela S. Krause



**Supplementary Figure 1. a)** Quantification of the calcium concentration ( $\mu\text{g}/\mu\text{l}$ ) in the BM of wildtype (WT) (FVB) mice and Col1-caPPR mice, which are characterized by an osteoblast-specific constitutive activation of the receptor for parathyroid hormone (PTH) and PTH-related peptide and increased bone remodeling. The BM of one femur per mouse was flushed and collected in 300  $\mu\text{l}$  of PBS, and the calcium concentration present in the noncellular fraction was determined (n=3, two-tailed *t*-test). **b-d)** Median fluorescence intensity (MFI) of green fluorescence protein (GFP) in GCaMP6s<sup>+</sup> BA/F3 (**b**), THP1 (**c**) and K562 (**d**) cells after treatment with 0-7.5 mM of  $\text{CaCl}_2$  for 5 minutes, measured by flow cytometry (n=3, one-way ANOVA, Tukey test). **e-g)** Immunofluorescence images (left) and quantification (right) of GCaMP6s<sup>+</sup> BA/F3 (**e**), THP1 (**f**) and K562 (**g**) cells expressing GFP and red fluorescence protein (RFP). Images were taken 5 minutes after the beginning of treatment with 0-7.5 mM  $\text{CaCl}_2$  (n=5, one-way ANOVA, Tukey test). The scale bar represents 400  $\mu\text{m}$ . **h)** Correlation of the integrated RFP intensity of BA/F3-GCaMP6s cells with the distance to the endosteum ( $\mu\text{m}$ ), as measured by intravital microscopy. In stacks of 7-17 images of an individual BA/F3-GCaMP6s cell, the RFP intensity of the middle stack was used as representative value. Pearson's correlation coefficient (*r*) and the P-value are shown. The n represents 34 individual cells which were analyzed. The experiments were repeated three times. **i)** Correlation of the integrated GFP intensity of GFP<sup>+</sup> BA/F3 (MSCV IRES GFP BCR-ABL1<sup>+</sup> BA/F3) cells with the distance to the endosteum ( $\mu\text{m}$ ), as measured by intravital microscopy to confirm lack of signal attenuation in calcium independence within the measured distance. In stacks of 3-7 images of an individual GFP<sup>+</sup> BA/F3 cell, the GFP intensity of the middle stack was used as representative value. Pearson's correlation coefficient (*r*) and the P-value are shown. The n represents 47 individual cells which were analyzed.

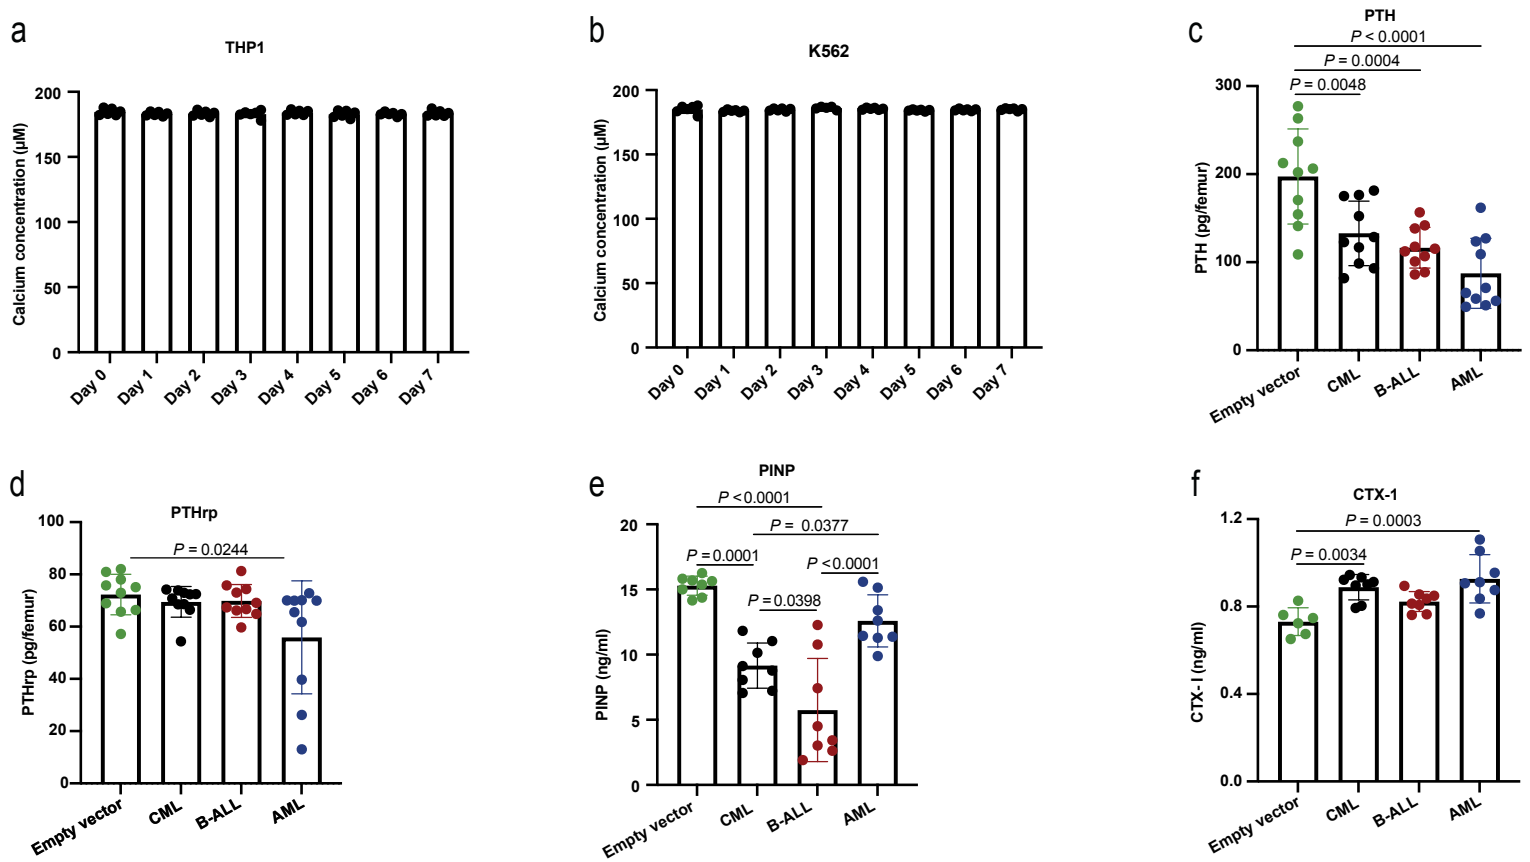

**Supplementary Figure 2. a-b** Quantification of the calcium concentration ( $\mu\text{M}$ ) in the cell culture media of THP1 (**a**) and K562 (**b**) cells ( $n=6$ , one-way ANOVA, Tukey test). **c-f** Levels of parathyroid hormone (PTH,  $n=10$ ) (**c**), parathyroid hormone-related peptide (PTHrp,  $n=10$ ) (**d**), procollagen type I N-propeptide (PINP,  $n=8$ ) (**e**) and C-terminal telopeptide of type I collagen (CTX-1,  $n=6-8$ ) (**f**) present in the bone marrow (BM) of irradiated wildtype ( $\text{Mx1-Cre}^{-/-}$  CaSR<sup>flox/flox</sup>) mice transplanted with empty vector control-transduced BM or moribund mice with chronic myeloid leukaemia (CML), acute myeloid leukaemia (AML) or B-cell acute lymphoblastic leukaemia (B-ALL) shortly before death, as measured by enzyme-linked immunosorbent assay (ELISA). All diseases were induced with the retroviral transduction/transplantation model. The BM of one femur per mouse was flushed and collected in 300  $\mu\text{l}$  of PBS, and the noncellular fraction was used for the ELISA (one-way ANOVA, Tukey test).



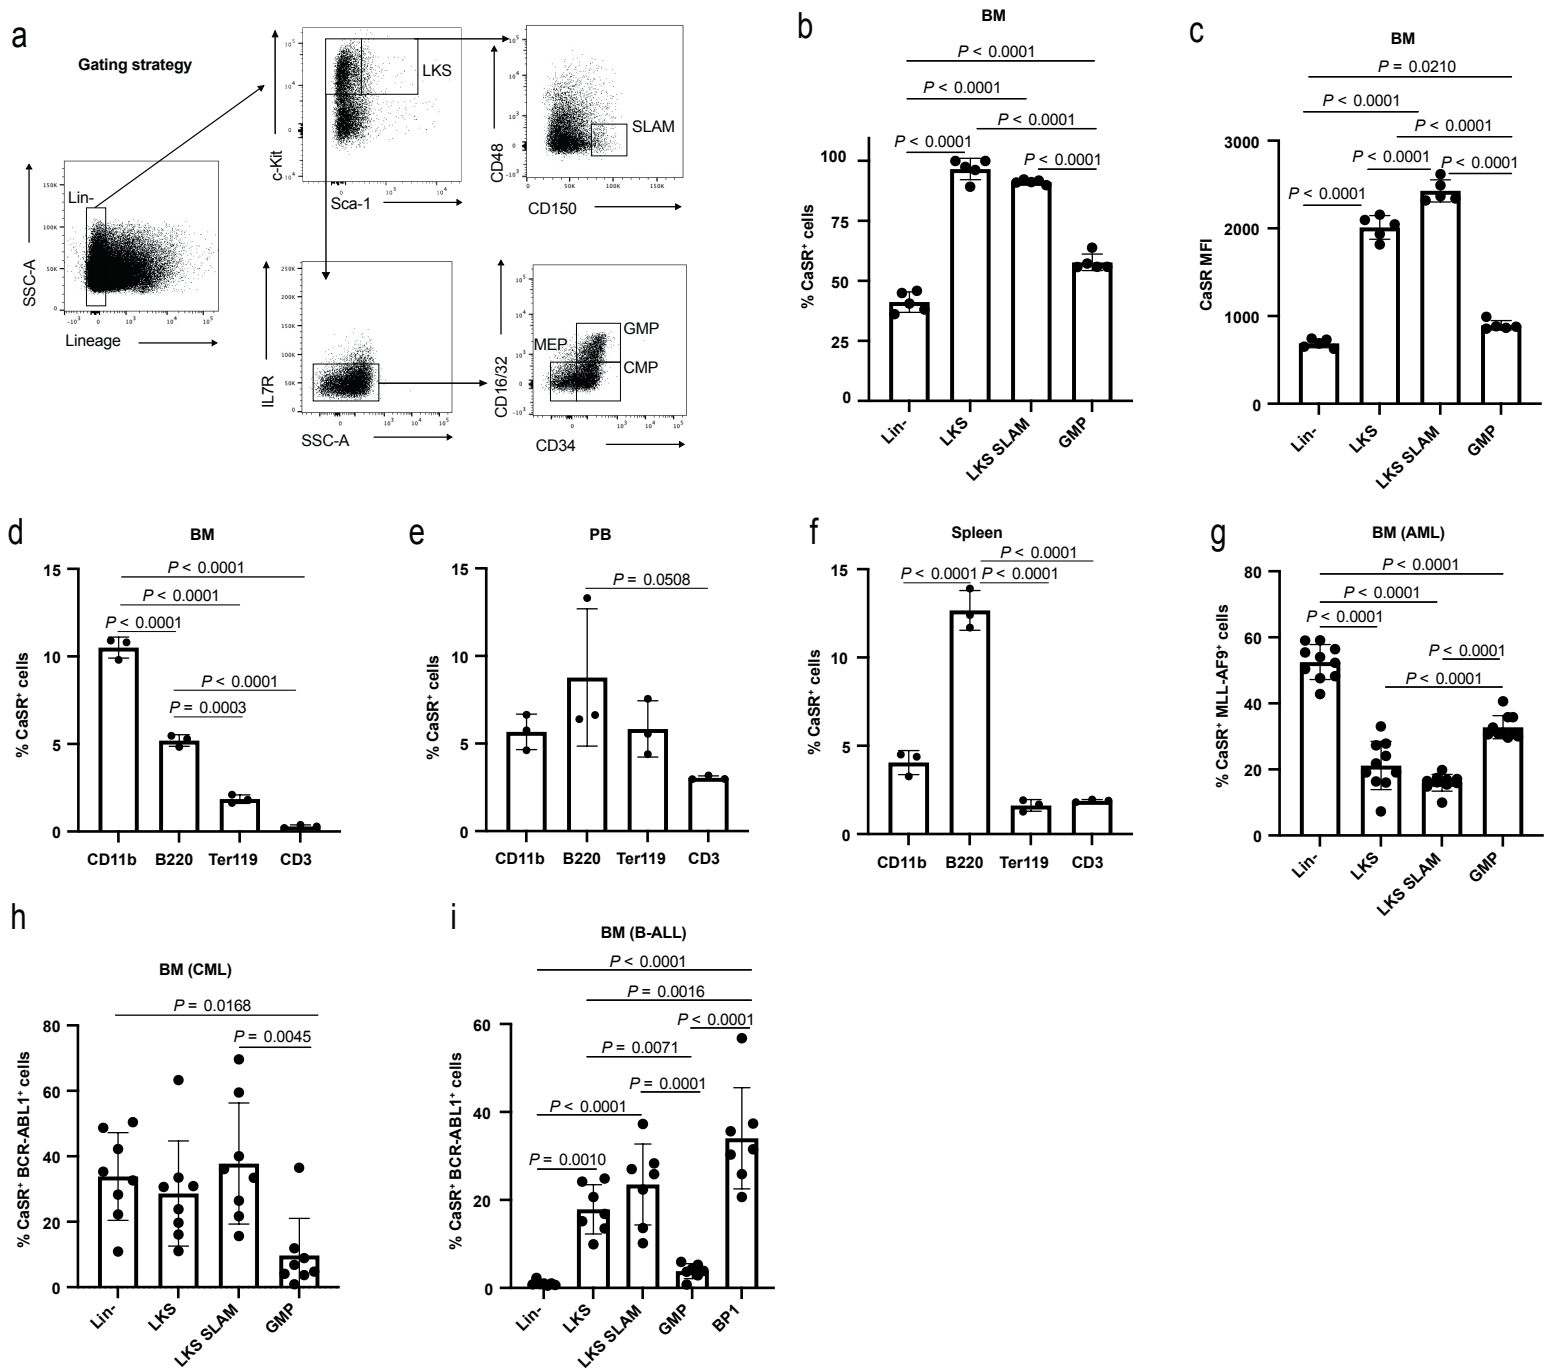

**Supplementary Figure 3.** **a**) Representative gating strategy for the analysis of Lin<sup>-</sup> c-Kit<sup>+</sup> Sca-1<sup>+</sup> (LKS), LKS CD48<sup>+</sup> CD150<sup>+</sup> (LKS SLAM) cells, Lin<sup>-</sup> IL7R<sup>-</sup> c-Kit<sup>+</sup> Sca-1<sup>-</sup> CD16/32<sup>+</sup> CD34<sup>+</sup> granulocyte-monocyte progenitors (GMP), Lin<sup>-</sup> IL7R<sup>-</sup> c-Kit<sup>+</sup> Sca-1<sup>-</sup> CD16/32<sup>-</sup> CD34<sup>+</sup> common myeloid progenitors (CMP) and Lin<sup>-</sup> IL7R<sup>-</sup> c-Kit<sup>+</sup> Sca-1<sup>-</sup> CD16/32<sup>-</sup> CD34<sup>-</sup> megakaryocyte-erythroid progenitors (MEP). **b-c**) Percentage of CaSR<sup>+</sup> cells (**B**) and mean fluorescence intensity (**C**) of single cells in Lin<sup>-</sup>, LKS, LKS SLAM and GMP cells of wildtype (Mx1-Cre<sup>-/-</sup> CaSR<sup>fllox/fllox</sup>) mice (one-way ANOVA, Tukey test n=5). **d-f**) Percentage of CaSR<sup>+</sup> cells of single cells positive for CD11b (myeloid cells), B220 (B cells), Ter119 (erythrocytes), and CD3 (T cells) in the bone marrow (BM) (**d**), peripheral blood (PB) (**e**) and spleen (**f**) of wildtype mice (one-way ANOVA, Tukey test, n=3). **g-i**) Percentage of CaSR<sup>+</sup> cells of single cells in Lin<sup>-</sup>, LKS, LKS SLAM and GMP cells of mice transplanted with wildtype (Mx1-Cre<sup>-/-</sup> CaSR<sup>fllox/fllox</sup>) BM transduced with MLL-AF9- (**g**) or BCR-ABL1-expressing retrovirus in the CML (**h**) or B-ALL models (**i**) (one-way ANOVA, Tukey test, n=7-10).

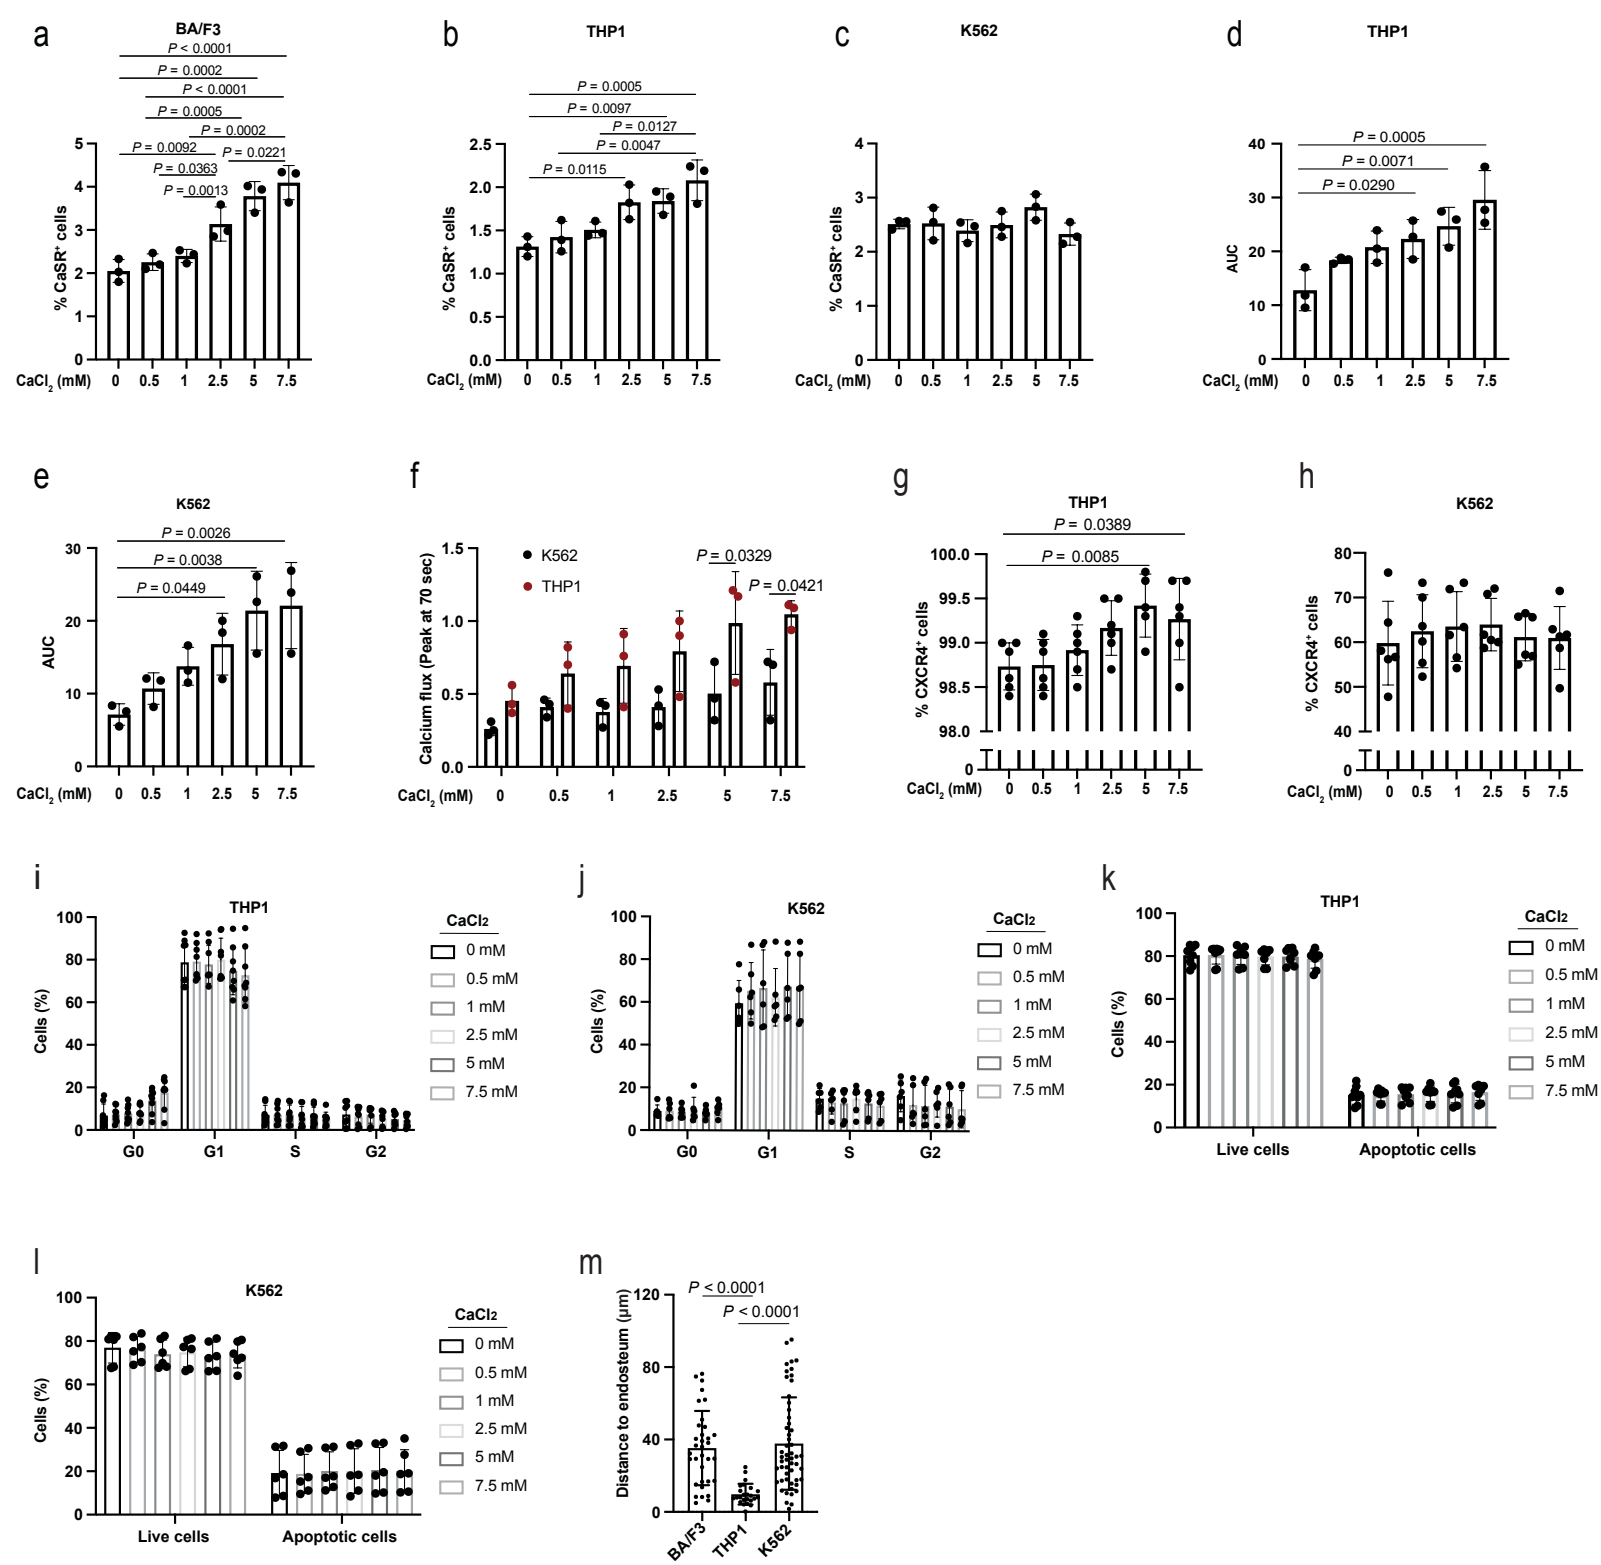

**Supplementary Figure 4.** a-c) Percentage of CaSR<sup>+</sup> of GCaMP6s<sup>+</sup> BA/F3 (n=3, one-way ANOVA, Dunnett test) (a), THP1 (n=3, one-way ANOVA, Tukey test) (b) and K562 (n=3, one-way ANOVA, Tukey test) (c) cells after treatment with 0-7.5 mM of CaCl<sub>2</sub> for 5 minutes, measured by flow cytometry. d-e) Quantification of the area under the curve (AUC) from the calcium flux analysis of THP1 (d) and K562 (e) cells, as represented in Figures 2f-g, respectively, using indo-1 dye after addition of 0-7.5 mM of CaCl<sub>2</sub> (n=3, one-way ANOVA, Dunnett test). f) Quantification of the calcium flux peak (ratio bound/unbound) of K562 and THP1 cells 70 seconds after CaCl<sub>2</sub> addition (0-7.5 mM) (n=3, two-way ANOVA, Sidak's test). g-h) Percentage of CXCR4<sup>+</sup> THP1 (g) and K562 (h) cells of single cells after treatment with different concentrations of CaCl<sub>2</sub> (0-7.5 mM) for 4 h (n=6, one-way ANOVA, Tukey test). i-j) Cell cycle status of THP1 (i) (n=8) and K562 (j) (n=6) cells of single cells treated with different concentrations of CaCl<sub>2</sub> (0-7.5 mM) for 4 h. k-l) Percentage of live or apoptotic THP1 (k) and K562 (l) cells of single cells treated with different concentrations of CaCl<sub>2</sub> (0-7.5 mM) for 4 h, detected by annexin V and DAPI staining (n=8). m) Distance (in μm) of intravenously transplanted CMTMR-labelled BA/F3, THP1 and K562 cells to the endosteum in the calvarium of Rag-2<sup>-/-</sup> IL2R γ<sup>-/-</sup> CD47<sup>-/-</sup> (BA/F3) or NOD SCID interleukin-2 receptor γ (IL-2Rγ)<sup>-/-</sup> (NSG) mice (THP1 and K562). 5x10<sup>5</sup> cells had been transplanted and were imaged by intravital microscopy 2 h after transplantation (n=24-53, one-way ANOVA, Tukey test). The imaging analysis was performed by ImageJ. The experiments were performed in three different mice per cohort.

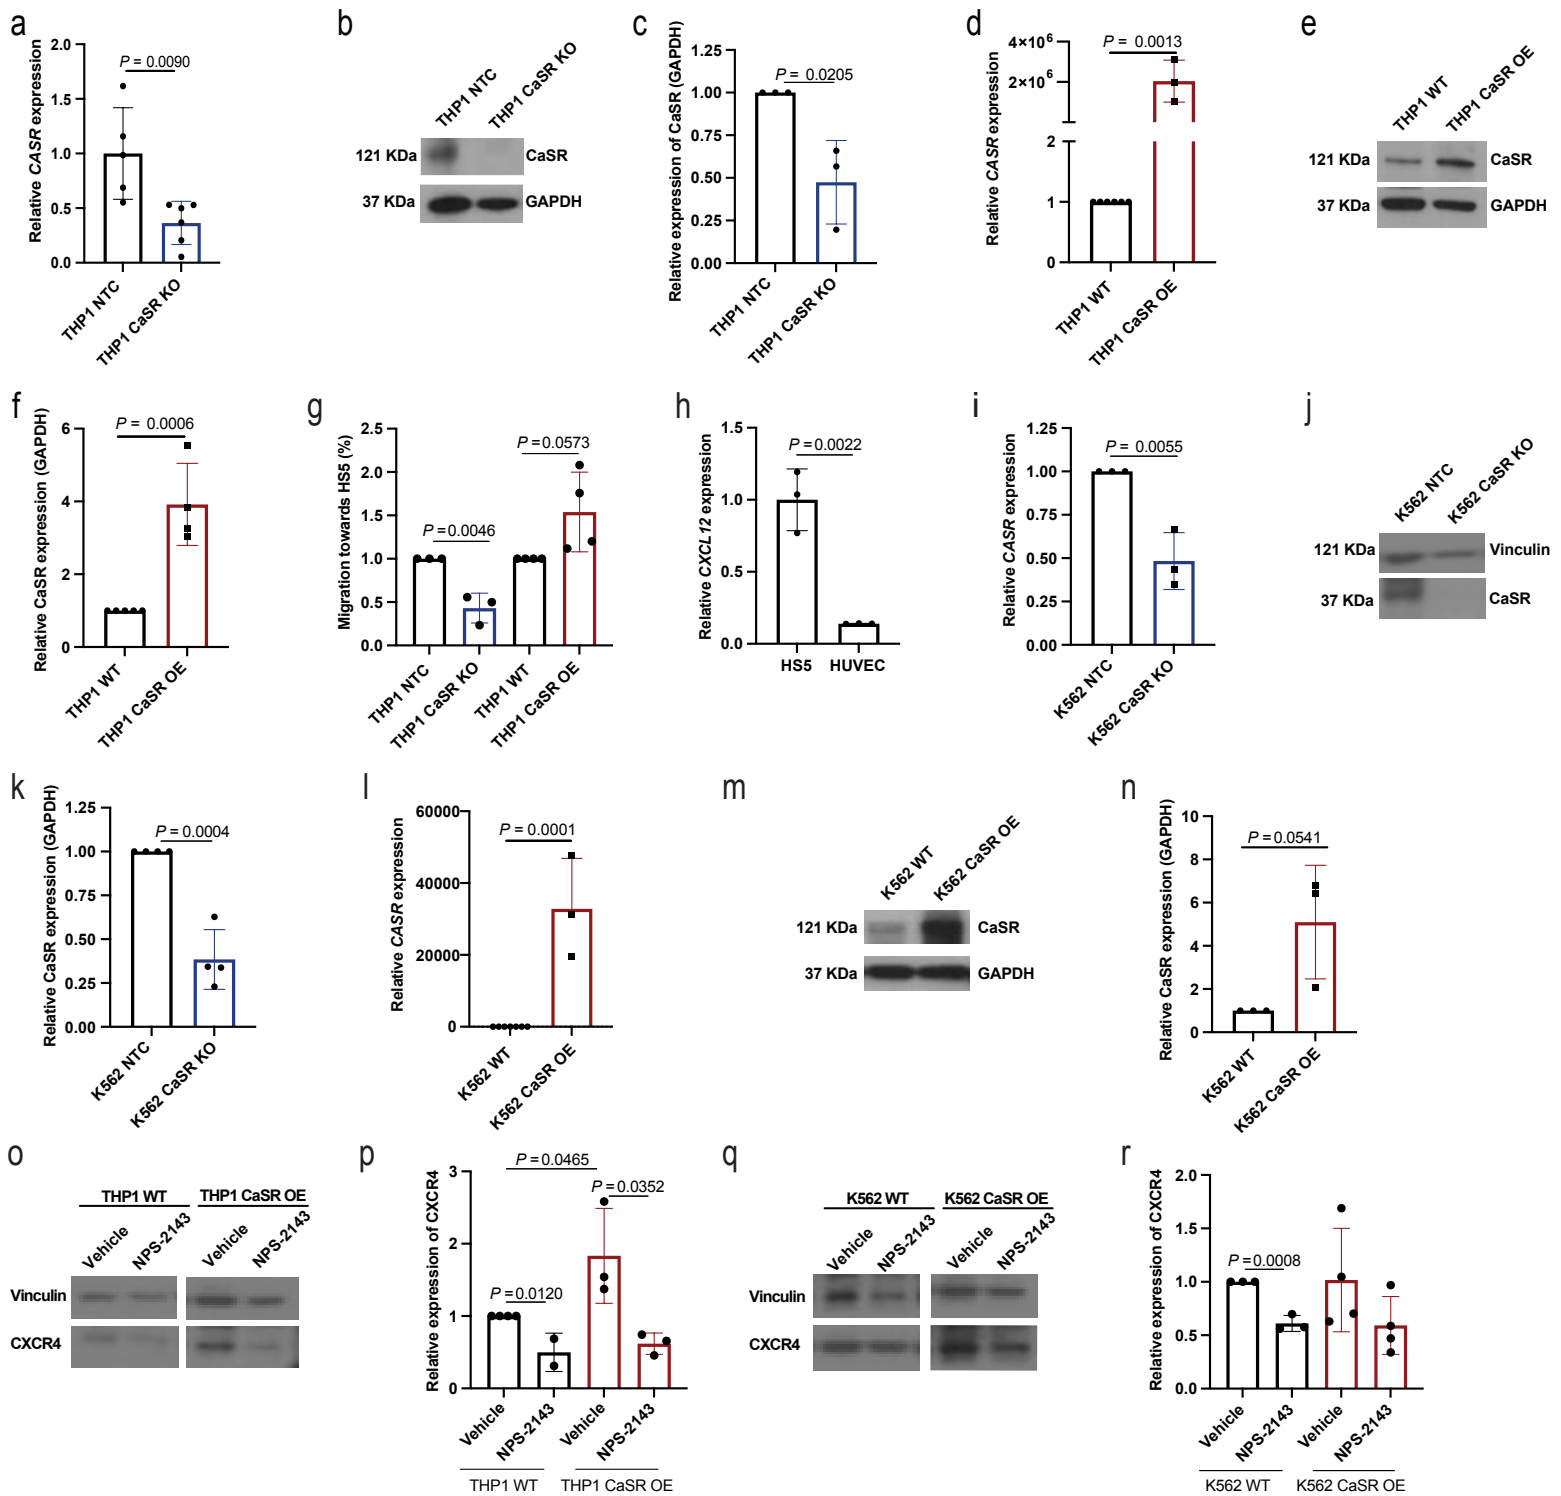

**Supplementary Figure 5.** **a**) Relative expression of *CASR* in non-target control (NTC) (black) or *CaSR* knockout (KO) THP1 cells (blue) by RT-qPCR analysis. Glyceraldehyde 3-phosphate dehydrogenase (*GAPDH*) was used as a housekeeping control (n=5-6, two-tailed *t*-test). **b-c**) Representative immunoblot analysis (**b**) and its quantification (**c**) of *CASR* (121 kDa) expression relative to *GAPDH* (37 kDa) in total cell lysates of NTC or *CaSR* KO THP1 cells (n=3, two-tailed *t*-test). The blot is representative of three independent experiments. **d**) Relative expression of *CASR* in wildtype (WT) (black) THP1 cells or THP1 cells overexpressing *CaSR* (THP1 *CaSR* OE) (red) by RT-qPCR analysis (n=3, two-tailed *t*-test). **e-f**) Representative immunoblot analysis (**e**) and its quantification (**f**) of *CASR* (121 kDa) expression relative to *GAPDH* (37kDa) in total cell lysates of WT THP1 or THP1 *CaSR* OE cells (n=3, two-tailed *t*-test). **g**) Number of THP1 NTC, *CaSR* KO, WT and *CaSR* OE cells which had migrated towards HS5 cells within 2 h. (n=3-4, one-way ANOVA, Tukey test). **h**) Relative expression of *CXCL12*, determined by RT-qPCR in HS5 and HUVEC cells (n=3, two-tailed *t*-test). Glyceraldehyde 3-phosphate dehydrogenase (*GAPDH*) was used as housekeeping gene. **i**) Relative expression of *CASR* in non-target control (NTC) (black) or *CaSR* knockout (KO) K562 cells (blue) by RT-qPCR analysis. Glyceraldehyde 3-phosphate dehydrogenase (*GAPDH*) was used as a housekeeping control (n=5-6, two-tailed *t*-test). **j-k**) Representative immunoblot analysis (**j**) and quantification (**k**) of *CASR* (121 kDa) expression relative to *GAPDH* (37 kDa) in total cell lysates of NTC or *CaSR* KO K562 cells. The blot is representative of three independent experiments. **l**) Relative expression of *CASR* in WT (black) K562 cells or K562 cells overexpressing *CaSR* (K562 *CaSR* OE) (red) by RT-qPCR analysis (n=3, two-tailed *t*-test). **m-n**) Representative immunoblot analysis (**m**) and its quantification (**n**) of *CASR* (121 kDa) expression relative to *GAPDH* (37kDa) in total cell lysates of WT THP1 or THP1 *CaSR* OE cells (n=3, two-tailed *t*-test). **o-p**) Representative immunoblot (**o**, **q**) and its quantification (**p**, **r**) for *CXCR4* (40 kDa) and *Vinculin* (124 kDa) expression in lysates of THP1 (**o-p**) and K562 (**q-r**) cells treated with NPS-2143 for 4 h (n=3-4, one-way ANOVA, Tukey test). The blots are representative of three or four independent experiments.

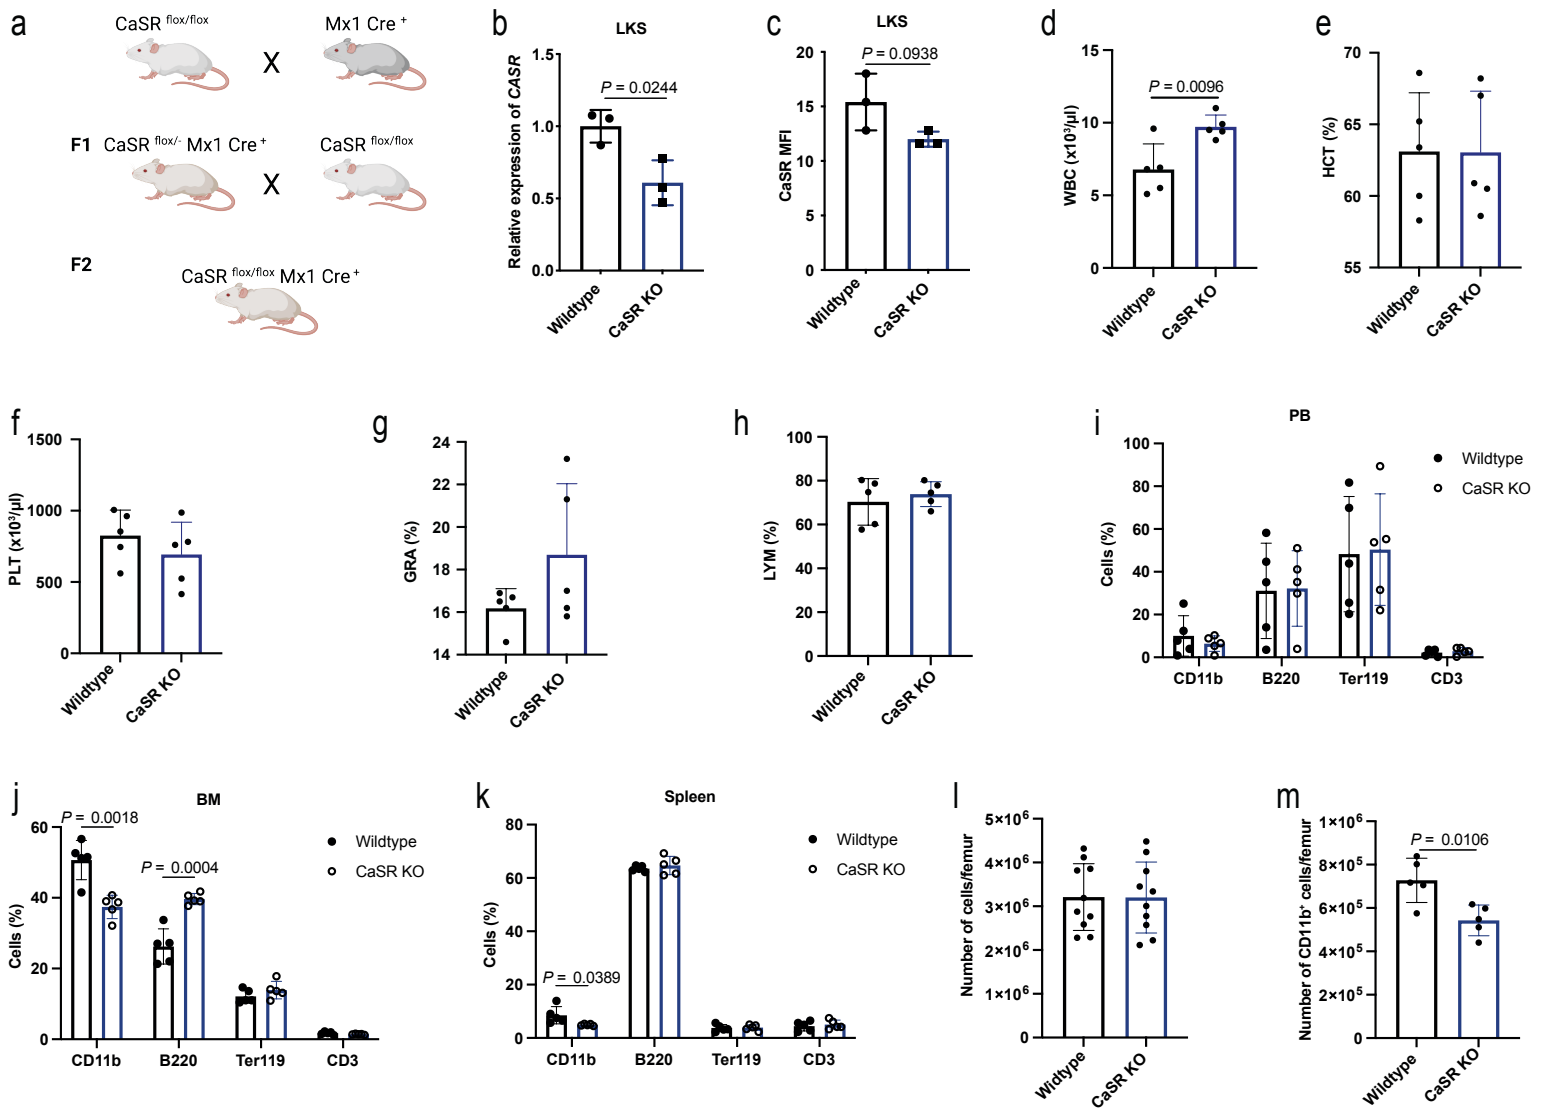

**Supplementary Figure 6.** a) Mating scheme for the generation of inducible CaSR KO mice. Mice homozygous for floxed *CaSR* alleles were crossed to animals heterozygous for the *Mx1-Cre* transgene to generate *Mx1-Cre<sup>+/+</sup> CaSR<sup>flox/-</sup>* mice. These mice were then crossed with *CaSR<sup>flox/flox</sup>* mice to generate litters which are homozygous for floxed alleles (*Mx1-Cre<sup>+/+</sup> CaSR<sup>flox/flox</sup>*). **b-c**) Relative expression and median fluorescence intensity (MFI), respectively, of *CaSR* determined by RT-qPCR (**b**) and by flow cytometry (**c**) on BM-derived Lin<sup>-</sup> c-Kit<sup>+</sup> Sca-1<sup>+</sup> (LKS) cells of wildtype (*Mx1-Cre<sup>-/-</sup> CaSR<sup>flox/flox</sup>*) and CaSR KO (*Mx1-Cre<sup>+/+</sup> CaSR<sup>flox/flox</sup>*) mice 10 days after poly I:C treatment (n=3, two-tailed *t*-test). **d-h**) White blood cell (WBC) count per  $\mu\text{l}$  (**d**), haematocrit (HCT) (**e**), platelet (PLT) count per  $\mu\text{l}$  (**f**), percentage of granulocytes (GRA) (**g**) and percentage of lymphocytes (LYM) (**h**) in peripheral blood (PB) of wildtype (black) or CaSR KO (blue) mice, as measured by complete blood count (CBC) analyser 10 days after poly I:C treatment (n=5, two-tailed *t*-test). **i-k**) Percentage of cells of single cells positive for CD11b (myeloid cells), B220 (B cells), Ter119 (erythrocytes), and CD3 (T cells) in the peripheral blood (**i**), bone marrow (**j**) and spleen (**k**) of wildtype (black) or CaSR KO (blue) mice 10 days after poly I:C treatment (two-way ANOVA, Sidak's test n=4-5). **l-m**) Number of total BM cells (**l**) and CD11b<sup>+</sup> cells (**m**) per femur of wildtype and CaSR KO mice, 10 days after poly I:C treatment (n=10, n=5, two-tailed *t*-test).

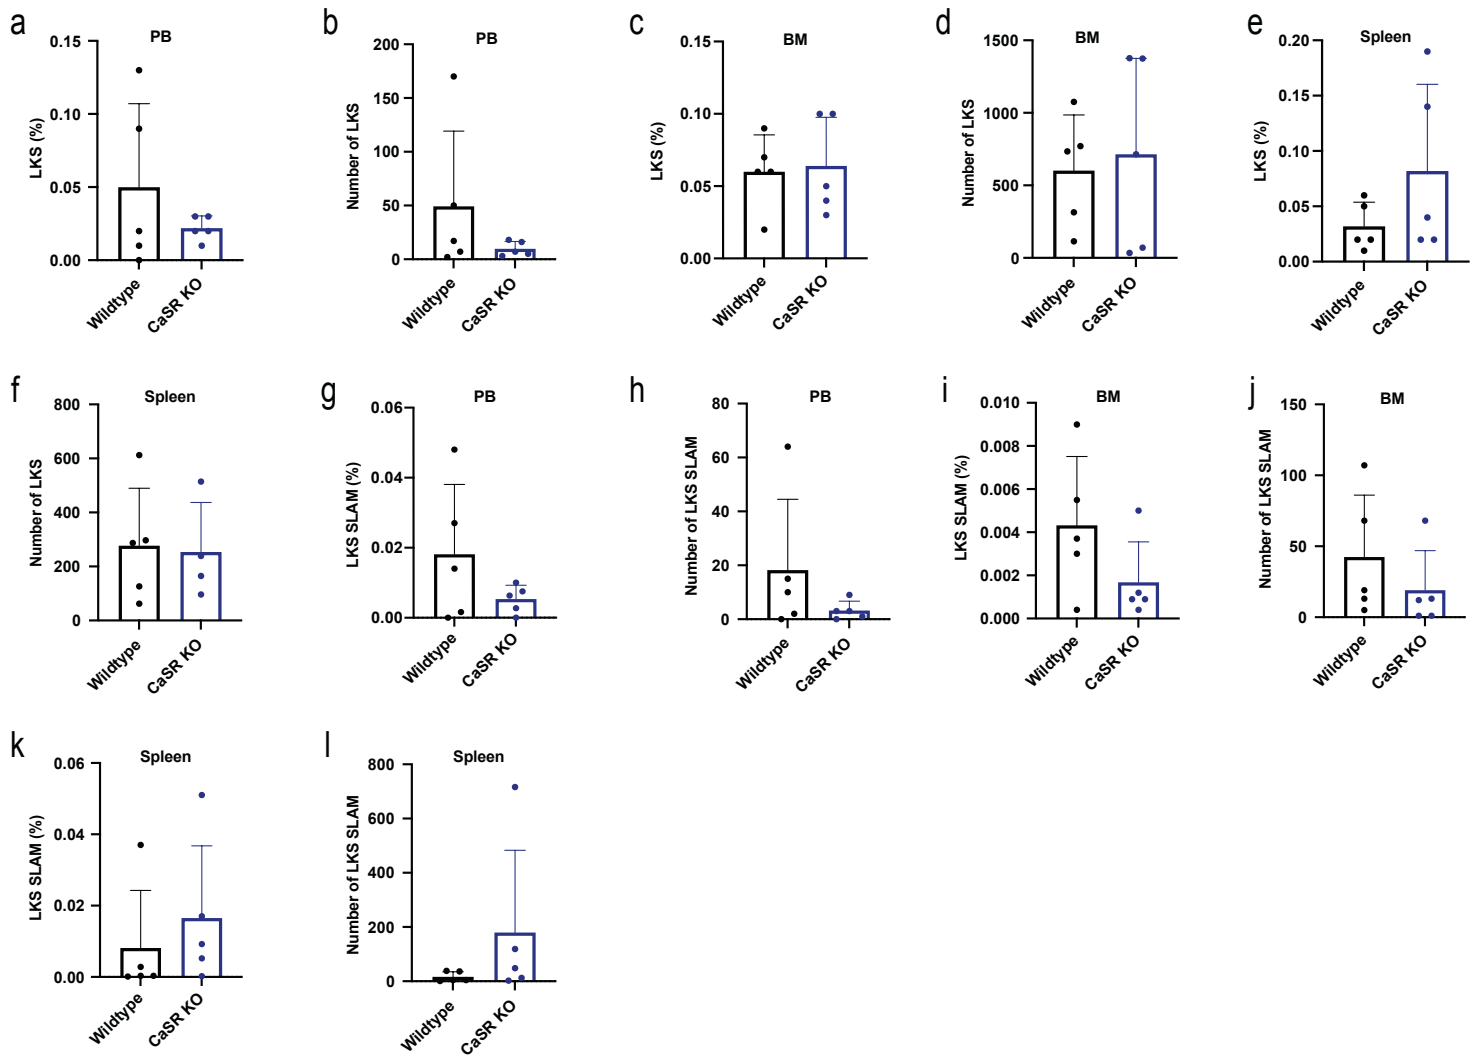

**Supplementary Figure 7.** a-f) Percentage of single cells and absolute number of Lin<sup>-</sup> c-Kit<sup>+</sup> Sca-1<sup>+</sup> (LKS) cells in peripheral blood (PB) (15  $\mu$ l) (a-b), bone marrow (BM) (one femur) (c-d) and spleen (e-f) of wildtype (Mx1-Cre<sup>-/-</sup> CaSR<sup>fllox/fllox</sup>) (black) or CaSR KO (Mx1-Cre<sup>+/-</sup> CaSR<sup>fllox/fllox</sup>) (blue) mice 10 days after after poly I:C treatment (n=5, two-tailed t-test). g-l) Percentage of single cells and absolute number of LKS CD48<sup>-</sup> CD150<sup>+</sup> (LKS SLAM) cells in peripheral blood (15  $\mu$ l) (g-h), bone marrow (one femur) (i-j) and spleen (k-l) of wildtype (black) or CaSR KO (blue) mice 10 days after poly I:C treatment (n=5, two-tailed t-test).

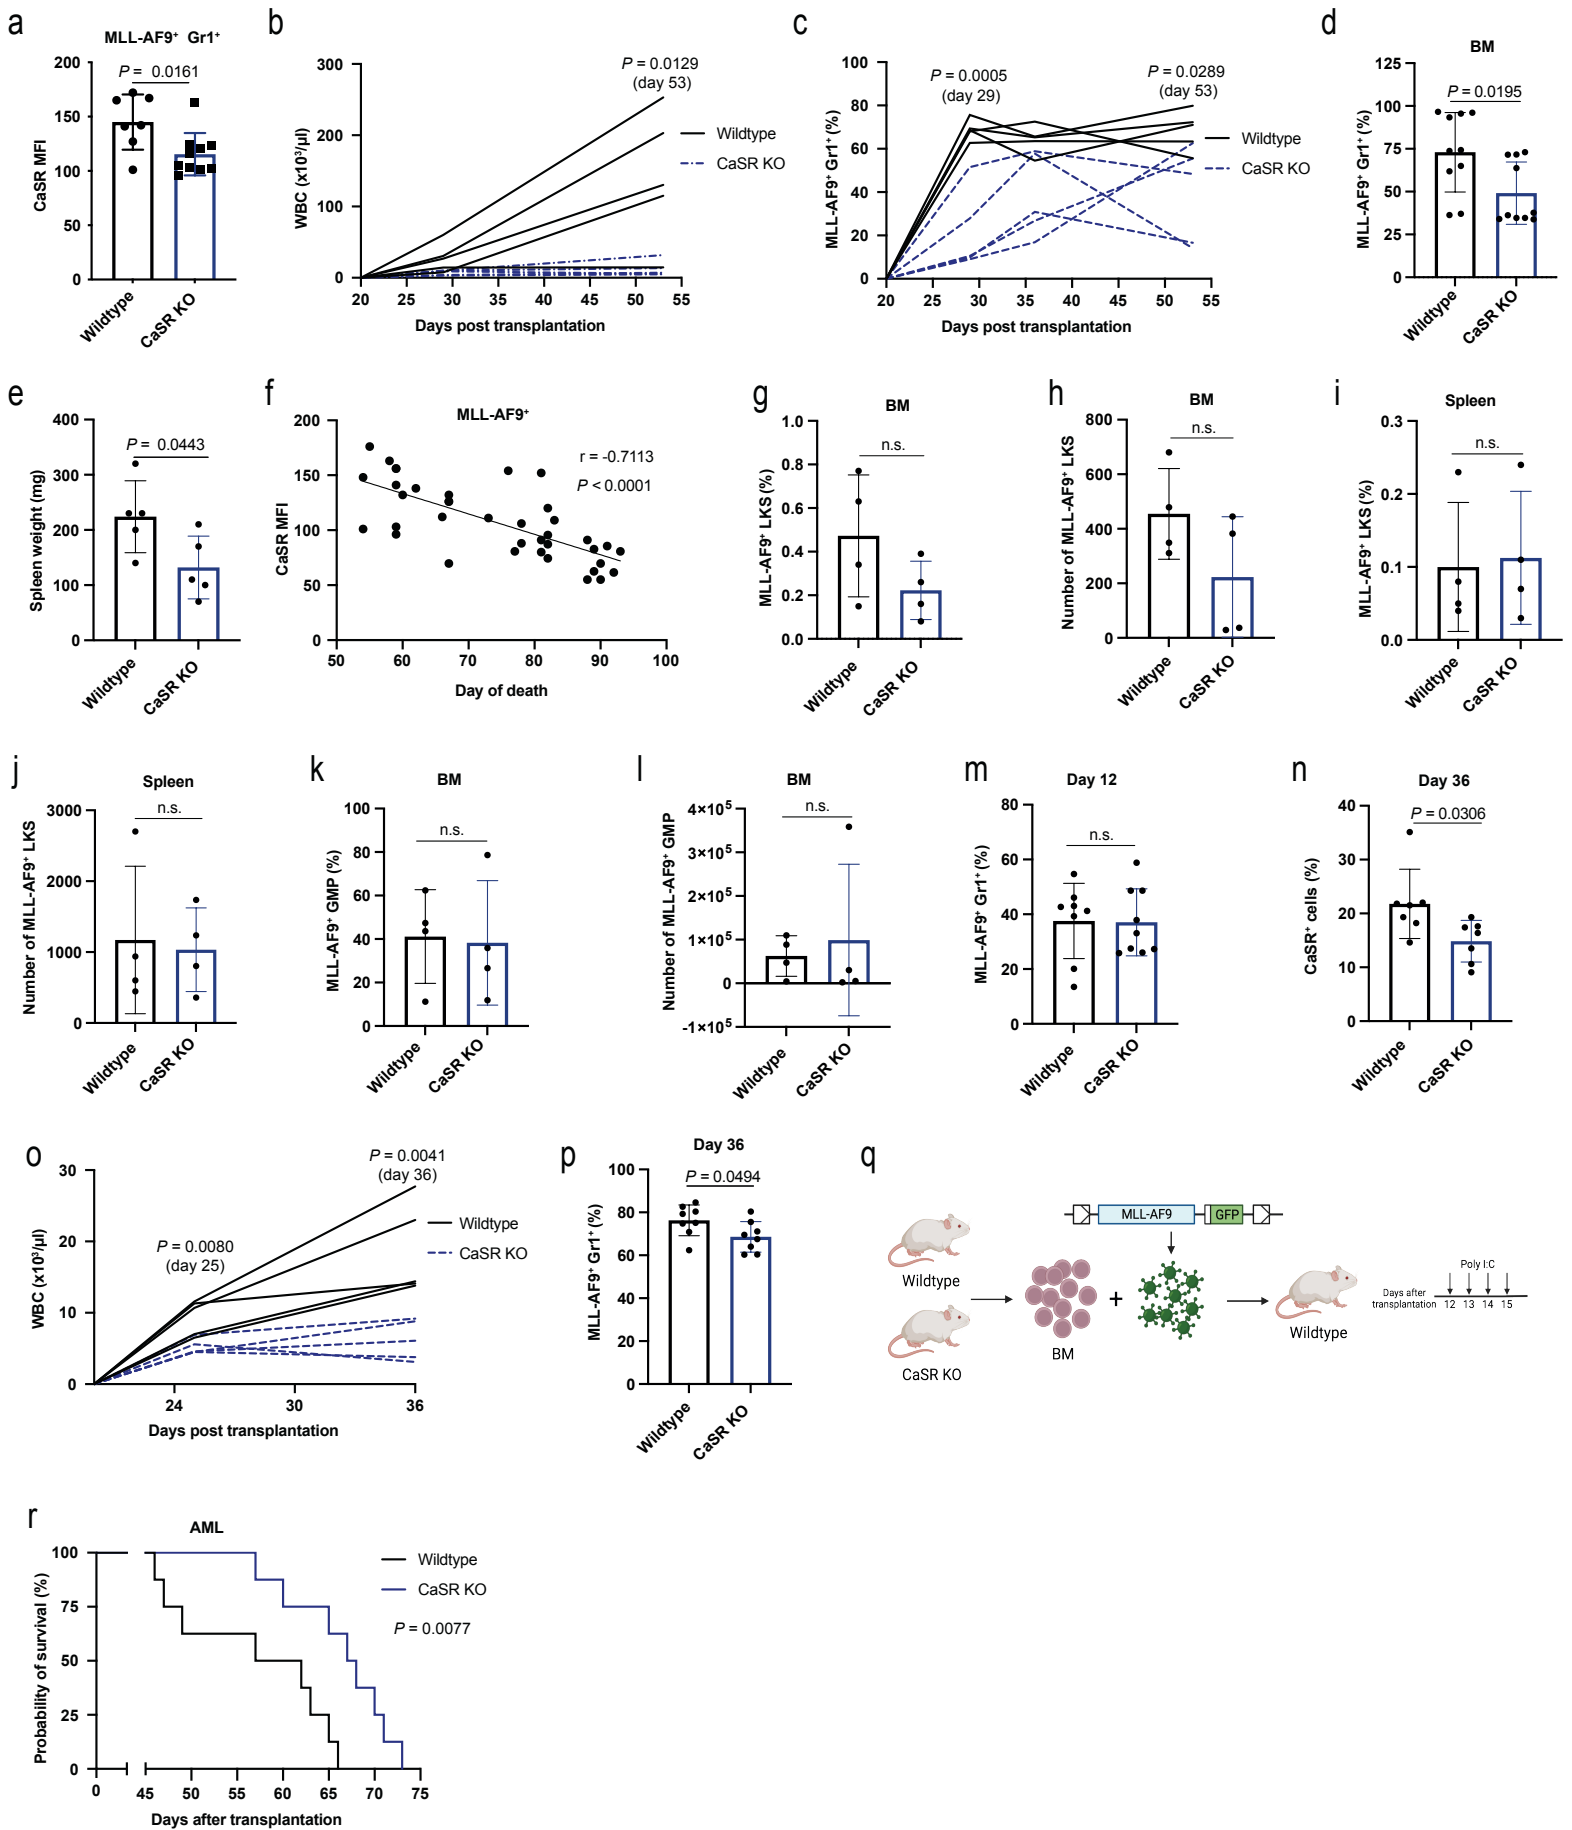

**Supplementary Figure 8.** **a**) Mean fluorescence intensity (MFI) of CaSR on MLL-AF9<sup>+</sup> Gr1<sup>+</sup> leukocytes in peripheral blood of wildtype (Mx1-Cre<sup>-/-</sup> CaSR<sup>fllox/fllox</sup>) mice transplanted with MLL-AF9<sup>+</sup> wildtype (Mx1-Cre<sup>-/-</sup> CaSR<sup>fllox/fllox</sup>) (black) or CaSR KO (Mx1-Cre<sup>+/-</sup> CaSR<sup>fllox/fllox</sup>) (blue) leukaemia-initiating cells (LIC) in the AML model (n=9-10, two-tailed *t*-test) 53 days after transplantation. **b-c**) White blood cell counts (WBC) (**b**) and percentage of MLL-AF9<sup>+</sup> (GFP<sup>+</sup>) Gr1<sup>+</sup> cells (**c**) in peripheral blood (PB) of recipients of wildtype (black) or CaSR KO (blue) BM cells (n=4, two-tailed *t*-test), transduced with MLL-AF9-expressing retrovirus in the AML model, overtime. Each line



represents an individual mouse. **d**) Percentage of MLL-AF9<sup>+</sup> (GFP<sup>+</sup>) Gr1<sup>+</sup> wildtype (black) or CaSR KO (blue) cells of single cells in bone marrow of mice transplanted with MLL-AF9<sup>+</sup> (GFP<sup>+</sup>) wildtype or CaSR KO BM LIC 40 days after transplantation (n=10, two-tailed *t*-test). **e**) Spleen weight of moribund mice which had been transplanted with wildtype (black) or CaSR KO (blue) MLL-AF9-transduced bone marrow (n=5, two-tailed *t*-test). **f**) Correlation between CaSR expression on MLL-AF9<sup>+</sup> (GFP<sup>+</sup>) PB leukocytes (on days 53/54 after transplantation) and day of death of mice transplanted with wildtype or CaSR KO MLL-AF9-transduced bone marrow (n=21). Pearson's correlation (*r*) and P-values are indicated next to the graph. **g-j**) Percentage of single cells and absolute number of MLL-AF9<sup>+</sup> (GFP<sup>+</sup>) Lin<sup>-</sup> c-Kit<sup>+</sup> Sca-1<sup>+</sup> (LKS) cells in the bone marrow (BM) (one femur) (**g-h**) or spleen (**i-j**) of wildtype recipients of wildtype (black) or CaSR KO (blue) BM cells, transduced with MLL-AF9-expressing retrovirus in the AML model, 12 days after transplantation (n=4, two-tailed *t*-test). Poly I:C had been administered from days 3 to 6 after transplantation. **k-l**) Percentage of single cells (**k**) and absolute number (**l**) of MLL-AF9<sup>+</sup> (GFP<sup>+</sup>) Lin<sup>-</sup> IL7R<sup>-</sup> c-Kit<sup>+</sup> Sca-1<sup>-</sup> CD16/32<sup>+</sup> CD34<sup>+</sup> granulocyte- monocyte progenitors (GMP) in the bone marrow (one femur) of wildtype mice transplanted with wildtype (black) or CaSR KO (blue) BM, transduced with MLL-AF9-expressing retrovirus (n=4, two-tailed *t*-test). **m**) Percentage of MLL-AF9<sup>+</sup> (GFP<sup>+</sup>) Gr1<sup>+</sup> wildtype (black) or CaSR KO (blue) cells of single cells in peripheral blood of mice transplanted with MLL-AF9<sup>+</sup> (GFP<sup>+</sup>) wildtype or CaSR KO BM LIC 12 days after transplantation, prior to CaSR depletion by poly I:C treatment (n=8, two-tailed *t*-test). **n**) Percentage of CaSR<sup>+</sup> cells of single cells in the peripheral blood of mice transplanted with MLL-AF9<sup>+</sup> (GFP<sup>+</sup>) wildtype (black) or CaSR KO (blue) LIC, determined on day 36 after transplantation. CaSR gene depletion was performed on day 12 after transplantation (n=8, two-tailed *t*-test). **o-p**) White blood cell counts (WBC) (n=4, two-tailed *t*-test) (**o**) and percentage of MLL-AF9<sup>+</sup> (GFP<sup>+</sup>) Gr1<sup>+</sup> cells of single cells (n=8, two-tailed *t*-test) (**p**) in peripheral blood of mice transplanted with wildtype (black) or CaSR KO (blue) MLLAF9<sup>+</sup> LIC 36 days post transplantation. CaSR gene depletion was performed on day 12 after transplantation. **q-r**) Transplantation scheme (**q**) and Kaplan-Meier-style survival curve (**r**) of wildtype mice transplanted with wildtype (black) or CaSR KO (blue) BM, transduced with MLL-AF9-expressing retrovirus. CaSR deletion with poly I:C was initiated on day 12 after transplantation (n=8, Log-rank test).

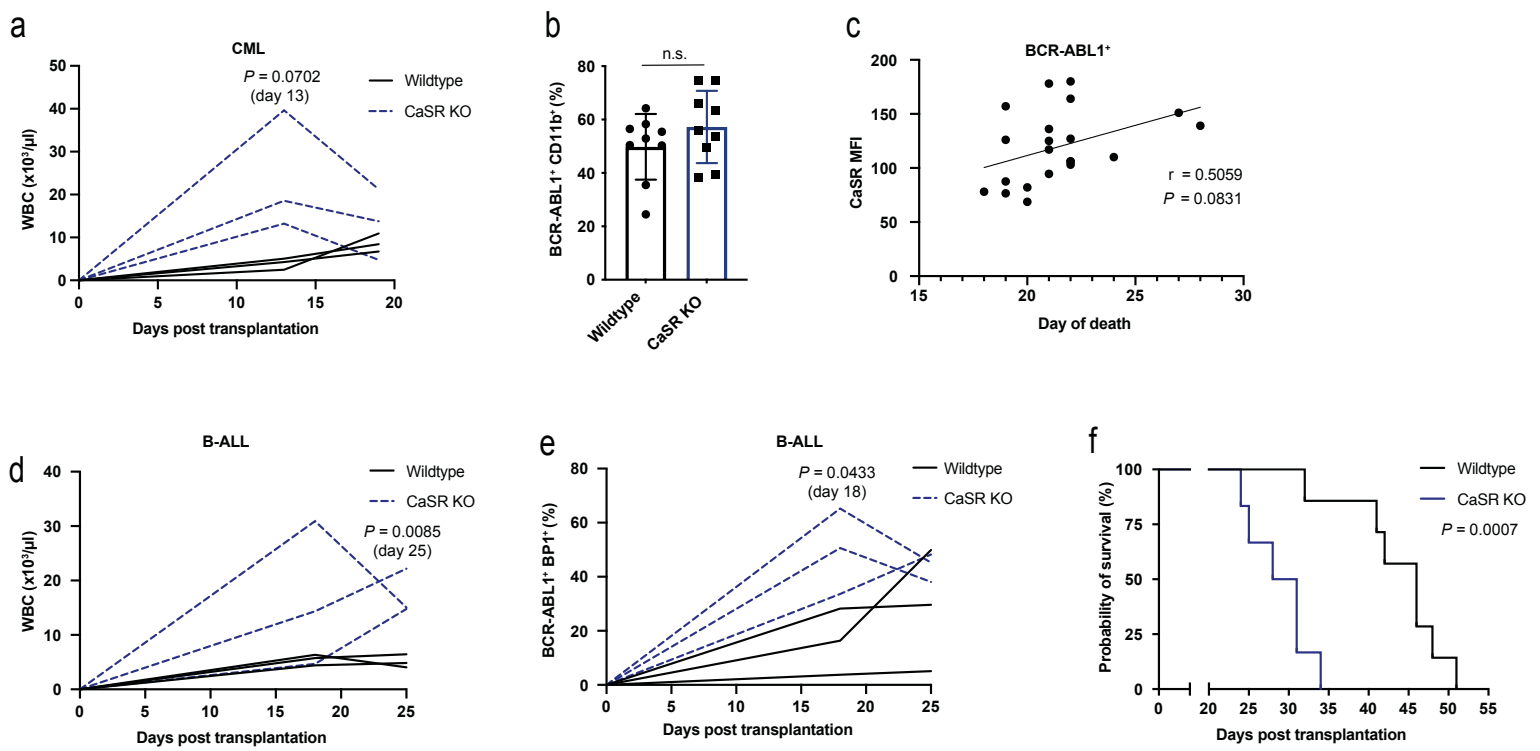

**Supplementary Figure 9. a-b)** White blood cell count (WBC) (n=3) (a) and percentage of BCR-ABL1<sup>+</sup> (GFP<sup>+</sup>) CD11b<sup>+</sup> cells of single cells (b) in peripheral blood of wildtype (Mx1-Cre<sup>-/-</sup> CaSR<sup>fllox/fllox</sup>) mice, transplanted with wildtype (black) or CaSR KO (Mx1-Cre<sup>-/-</sup> CaSR<sup>fllox/fllox</sup>) (blue) BM cells, transduced with BCR-ABL1-expressing retrovirus in the CML model 13 days after transplantation (n=9, two-tailed *t*-test). **c)** Correlation between CaSR expression on BCR-ABL1<sup>+</sup> (GFP<sup>+</sup>) PB leukocytes (on day 15 after transplantation) and day of death of mice transplanted with wildtype or CaSR KO BCR-ABL1-transduced bone marrow in the CML model (n=21). Pearson's correlation (*r*) and *P*-values are indicated next to the graph. **d-e)** White blood cell count (WBC) (d) and percentage of BCR-ABL1<sup>+</sup> BP1<sup>+</sup> pre-B cells of single cells (e) in peripheral blood of wildtype recipients of wildtype (black) or CaSR KO (blue) BM, transduced with BCR-ABL1-expressing retrovirus in the B-ALL model (n=3, *t*-test). **f)** Kaplan-Meier-style survival curve of recipient mice transplanted with wildtype (black) or CaSR KO (blue) BM, transduced with BCR-ABL1-expressing retrovirus in the B-ALL model (n=6-7, Log-rank test). All recipient mice were injected with 10 mg/kg poly I:C on days 3-6 after transplantation.

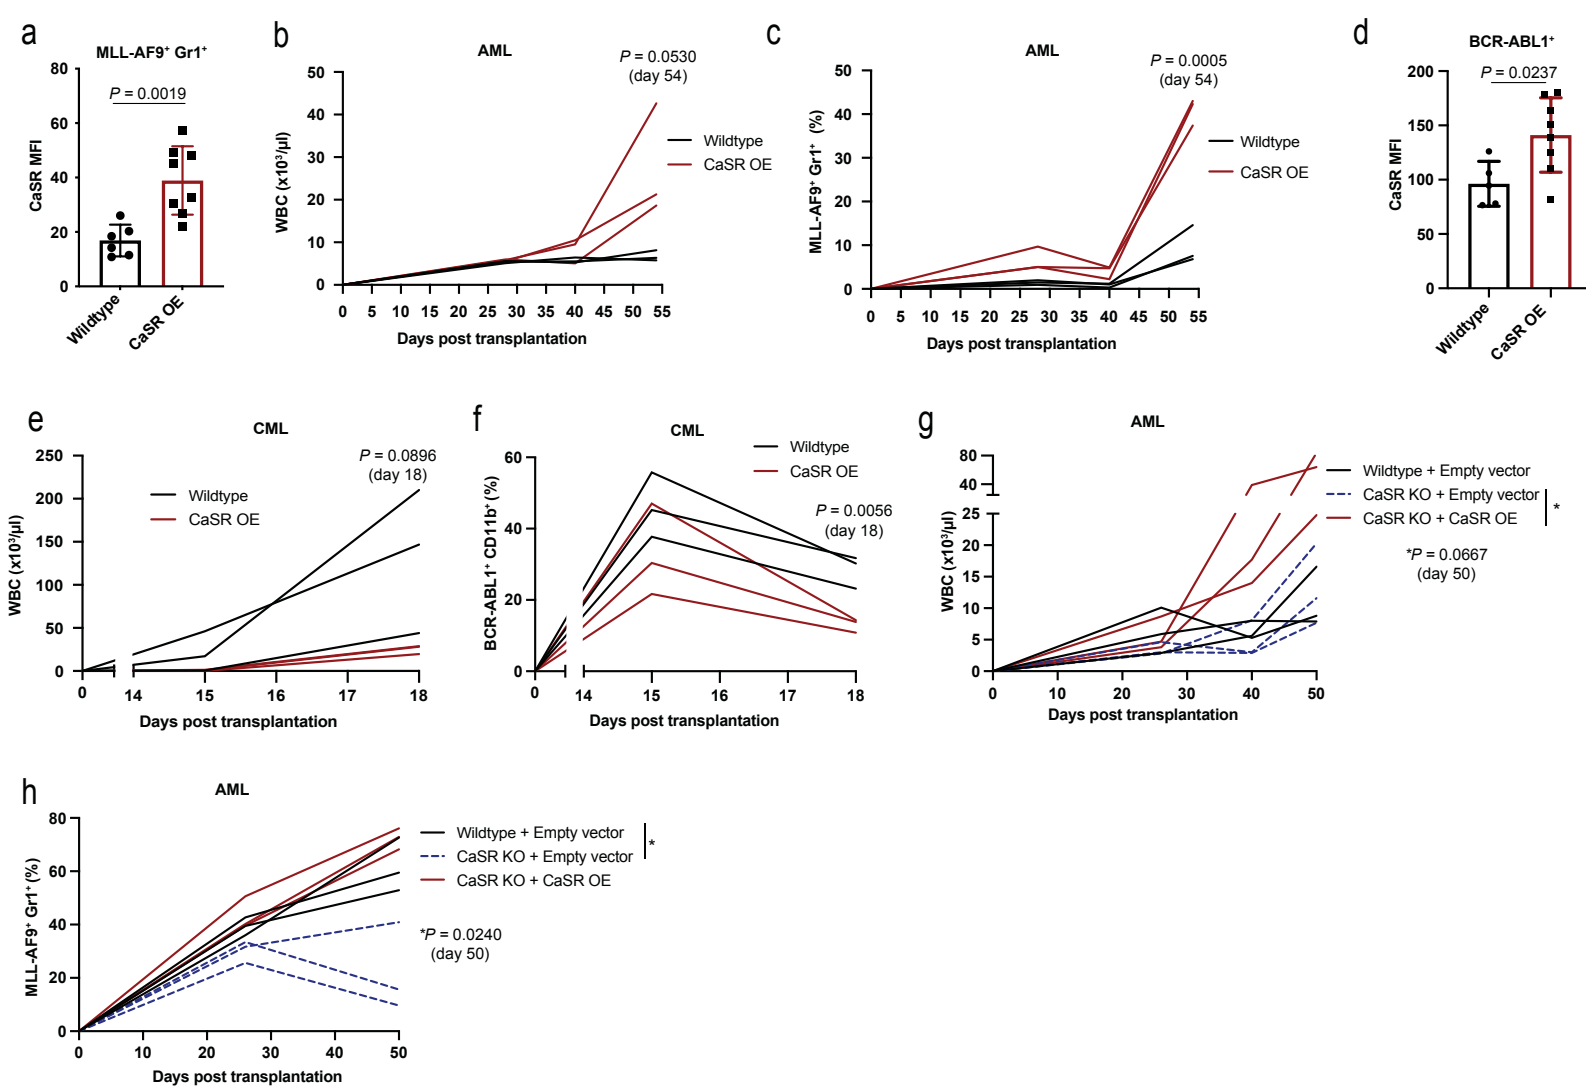

**Supplementary Figure 10.** **a**) Mean fluorescence intensity (MFI) of CaSR on MLL-AF9<sup>+</sup> Gr1<sup>+</sup> leukocytes in peripheral blood of BALB/c wildtype mice transplanted with MLL-AF9<sup>+</sup> leukaemia-initiating cells (LIC), co-transduced with empty vector- (black) or CaSR-overexpressing retrovirus (red) in the AML model (n=9-10, two-tailed *t*-test) 54 days post transplantation. **b-c**) White blood cell count (WBC) (**b**) and percentage of MLL-AF9<sup>+</sup> (RFP<sup>+</sup>) Gr1<sup>+</sup> cells of single cells (**c**) in peripheral blood of wildtype BALB/c recipients of wildtype (black) or CaSR OE (red) BALB/c BM cells, transduced with MLL-AF9-expressing retrovirus (n=9-10, two-tailed *t*-test). **d**) Mean fluorescence intensity (MFI) of CaSR on BCR-ABL1<sup>+</sup> (RFP<sup>+</sup>) leukocytes in peripheral blood of wildtype BALB/c mice transplanted with BCR-ABL1<sup>+</sup> BALB/c LIC, cotransduced with empty vector- (black) or CaSR-overexpressing retrovirus (red) in the CML model 15 days after transplantation (n=6-8, two-tailed *t*-test). **e-f**) White blood cell count (WBC) (**e**) and percentage of BCR-ABL1<sup>+</sup> CD11b<sup>+</sup> cells of single cells (**f**) in peripheral blood of BALB/c recipients of wildtype (black) or CaSR OE (red) BALB/c BM cells, transduced with BCR-ABL1-expressing retrovirus in the CML model (n=6-8, two-tailed *t*-test). **g-h**) White blood cell count (WBC) (**g**) and percentage of MLL-AF9<sup>+</sup> (RFP<sup>+</sup>) Gr1<sup>+</sup> cells of single cells (**h**) in peripheral blood of wildtype (Mx1-Cre<sup>-/-</sup> CaSR<sup>flox/flox</sup>) recipients of wildtype (black), CaSR KO (Mx1-Cre<sup>+/-</sup> CaSR<sup>flox/flox</sup>) (blue) or CaSR KO cells, transduced with CaSR OE-expressing retrovirus (red) cotransduced with MLL-AF9-expressing retrovirus (n=8, one-way ANOVA, Tukey test). The wildtype BM (black) and the CaSR KO BM (blue) was cotransduced with empty vector-expressing retrovirus.

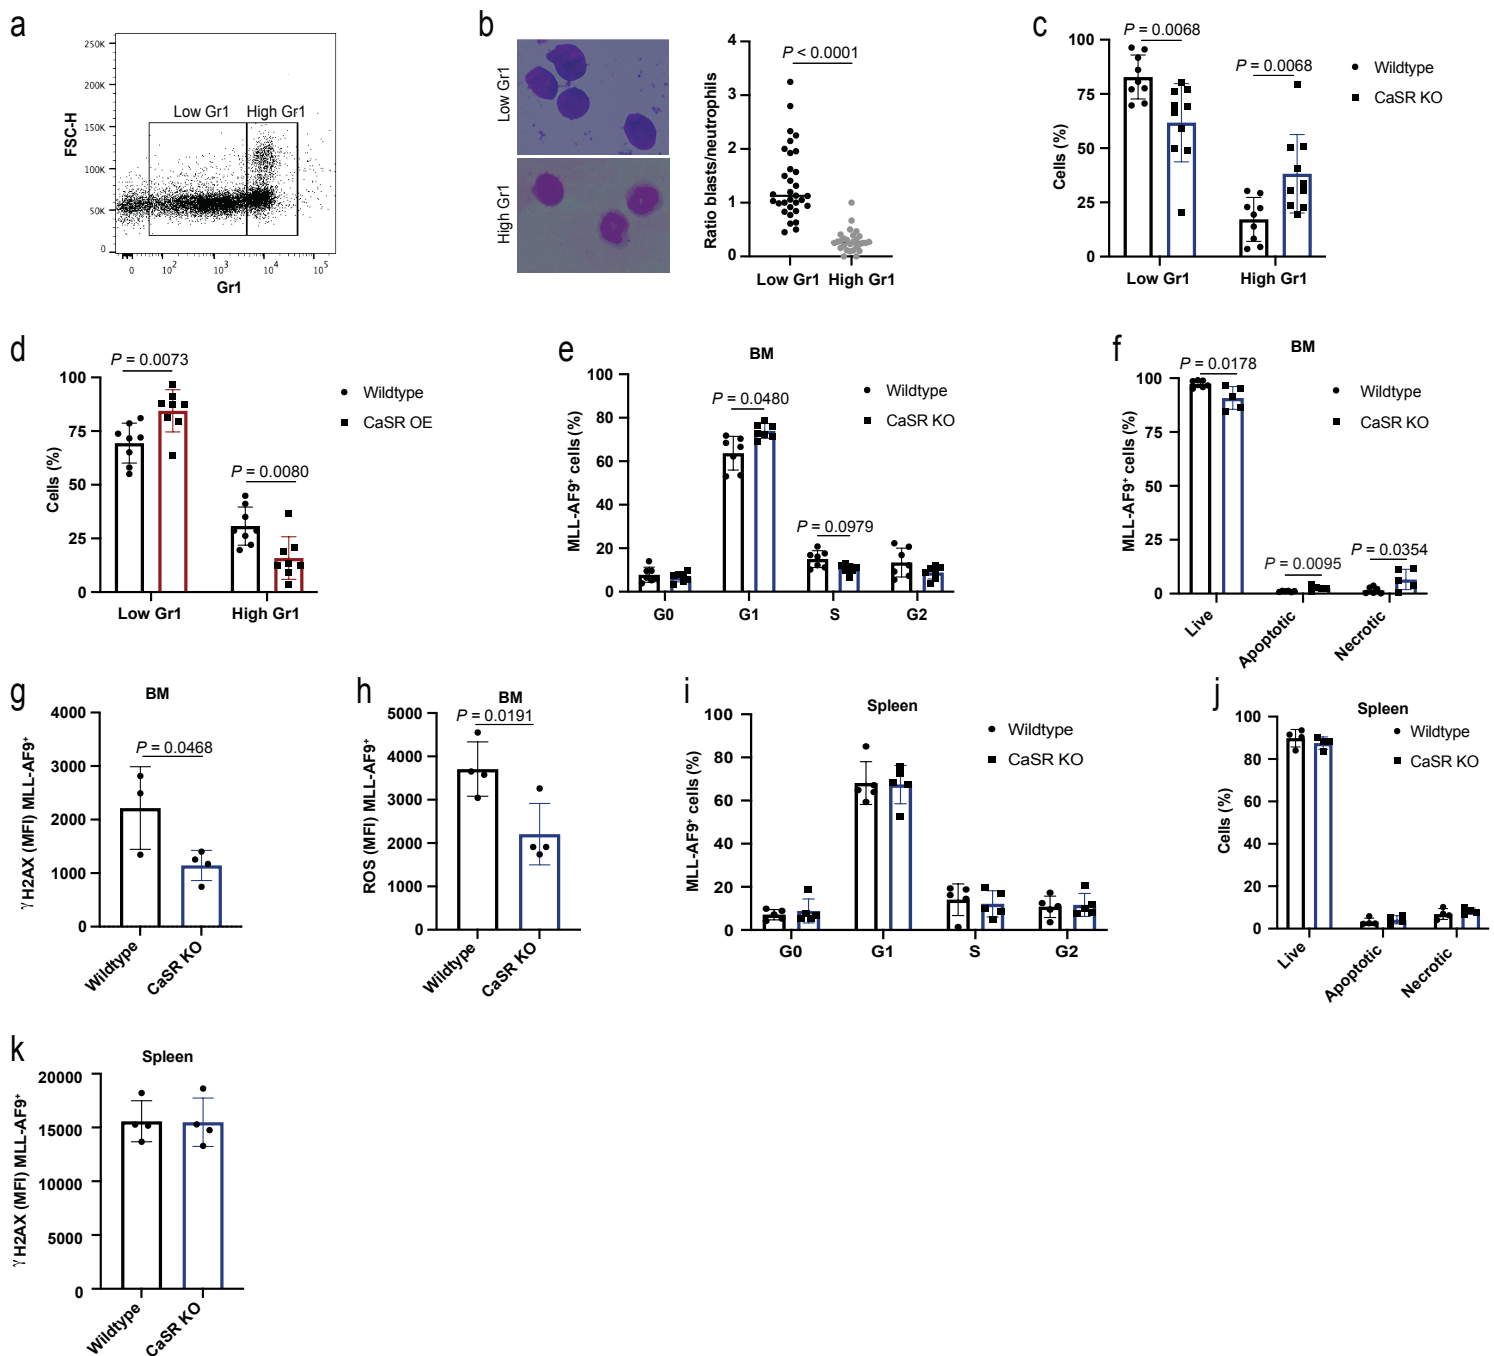

**Supplementary Figure 11.** **a**) Representative FACS plot of the percentage of low versus high Gr1 surface expression on MLL-AF9<sup>+</sup> (GFP<sup>+</sup>) cells in the peripheral blood (PB) of mice. **b**) Representative Giemsa staining (left) and quantification (right) of the ratio of blasts/neutrophils in sorted MLL-AF9<sup>+</sup> (GFP<sup>+</sup>) leukocytes with low or high surface expression of Gr1. The MLL-AF9<sup>+</sup> (GFP<sup>+</sup>) leukocytes were isolated from the BM of wildtype (Mx1-Cre<sup>-/-</sup> CaSR<sup>flx/flx</sup>) recipients of wildtype BM transduced with MLL-AF9-expressing retrovirus in the AML model on day 40 after transplantation, based on high or low expression of Gr1 (n=28-32, two-tailed Mann-Whitney test). **c**) Percentage of MLL-AF9<sup>+</sup> cells of single cells with low or high surface expression of Gr1 in the PB of wildtype mice which had been transplanted with wildtype (black) or CaSR KO (Mx1-Cre<sup>+/-</sup> CaSR<sup>flx/flx</sup>) (blue) BM, transduced with MLL-AF9-expressing retrovirus on day 36 after transplantation (n=9-10, two-way ANOVA, Sidak's test). **d**) Percentage of MLL-AF9<sup>+</sup> cells of single cells with low or high surface expression of Gr1 in the PB of WT BALB/c mice which had been transplanted with wildtype BALB/c MLL-AF9<sup>+</sup> bone marrow, co-transduced with empty vector- (black) or CaSR overexpressing (OE)- (red) retrovirus on day 40 after transplantation (n=8, two-way ANOVA, Sidak's test). **e**) Cell cycle status of MLL-AF9<sup>+</sup> (GFP<sup>+</sup>) cells of single cells in the BM of wildtype recipients of wildtype (black) or CaSR KO (blue) MLL-AF9<sup>+</sup> leukaemia-initiating cells (LIC) using Ki67 staining on day 40 after transplantation (n=7, two-way ANOVA, Sidak's test). **f**) Percentage of MLL-AF9<sup>+</sup> (GFP<sup>+</sup>) live, apoptotic or necrotic MLL-AF9<sup>+</sup> (GFP<sup>+</sup>) cells of single cells in the bone marrow of mice transplanted with wildtype (black) or CaSR KO (blue) MLL-AF9<sup>+</sup> LIC, detected by annexin V and DAPI staining, on day 40 after transplantation (n=5-6, two-way ANOVA, Sidak's test). **g**) Median fluorescence intensity (MFI) of  $\gamma$ H2AX in MLL-AF9<sup>+</sup> cells of single cells in the BM of wildtype recipients of wildtype (black) or CaSR KO (blue) MLL-AF9<sup>+</sup> LIC, 40 days after transplantation (n=3-4, two-tailed t-test). **h**) Mean fluorescence intensity (MFI) of reactive oxygen species (ROS) in MLL-AF9<sup>+</sup> cells of single cells in the BM of mice transplanted with MLL-AF9<sup>+</sup> wildtype (black) or CaSR KO (blue) BM on day 40 after transplantation (n=5, two-tailed t-test). **i**) Cell cycle status of MLL-AF9<sup>+</sup> (GFP<sup>+</sup>) cells of single cells in the spleen of wildtype recipients of wildtype (black) or CaSR KO (blue) MLL-AF9<sup>+</sup> LIC using Ki67 and DAPI staining on day 40 after transplantation (n=7, two-way ANOVA, Sidak's test). **j**) Percentage of MLL-AF9<sup>+</sup> (GFP<sup>+</sup>) live, apoptotic or necrotic cells of single cells in the spleen of mice transplanted with wildtype (black) or CaSR KO (blue) MLL-AF9<sup>+</sup> LIC, detected by annexin V and DAPI staining, on day 40 after transplantation (n=4, two-way ANOVA, Sidak's test). **k**) Median fluorescence intensity (MFI) of  $\gamma$ H2AX in MLL-AF9<sup>+</sup> cells of single cells in the spleen of wildtype recipients of wildtype (black) or CaSR KO (blue) MLL-AF9<sup>+</sup> LIC, 40 days after transplantation (n=3-4, two-tailed t-test).

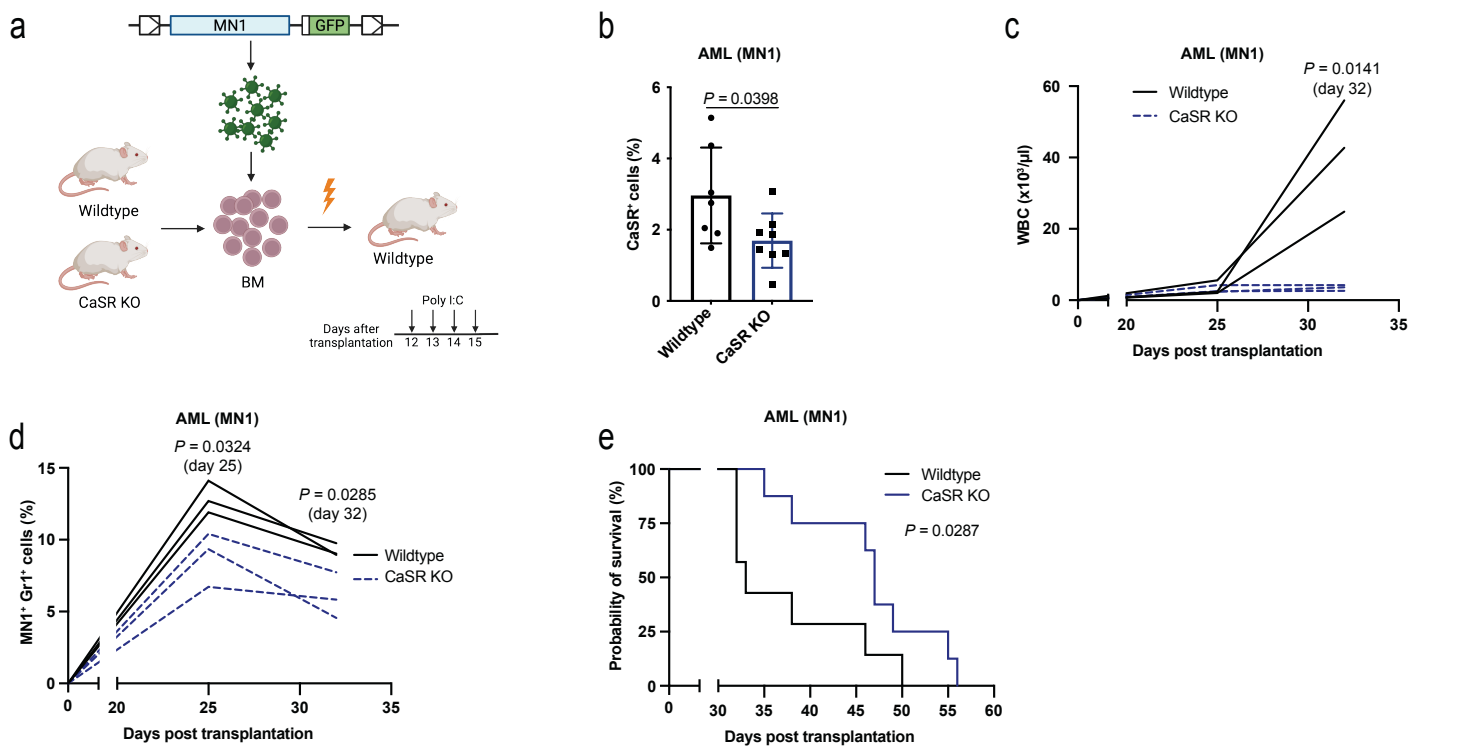

**Supplementary Figure 12.** a) Schematic representation of the transplantation of mice with wildtype or CaSR KO BM cells, transduced with MN1-expressing retrovirus. b) Percentage of CaSR<sup>+</sup> cells of single cells in peripheral blood of wildtype (Mx1-Cre<sup>-/-</sup> CaSR<sup>fllox/fllox</sup>) mice transplanted with wildtype (black) or CaSR KO (Mx1-Cre<sup>+/-</sup> CaSR<sup>fllox/fllox</sup>) (blue) MN1<sup>+</sup> LIC, measured on day 25 after transplantation (n=7-8, two-tailed *t*-test). c-d) White blood cell counts (WBC) (c) and percentage of MN1<sup>+</sup> (GFP<sup>+</sup>) Gr1<sup>+</sup> leukocytes of single cells (d) in peripheral blood of wildtype mice transplanted with MN1<sup>+</sup> wildtype (black) or CaSR KO (blue) bone marrow cells (n=7-8, two-tailed *t*-test) over time. e) Kaplan-Meier-style survival curve of wildtype mice transplanted with MN1<sup>+</sup> wildtype (black) or CaSR KO (blue) BM cells (n=7-8, Log-rank test).

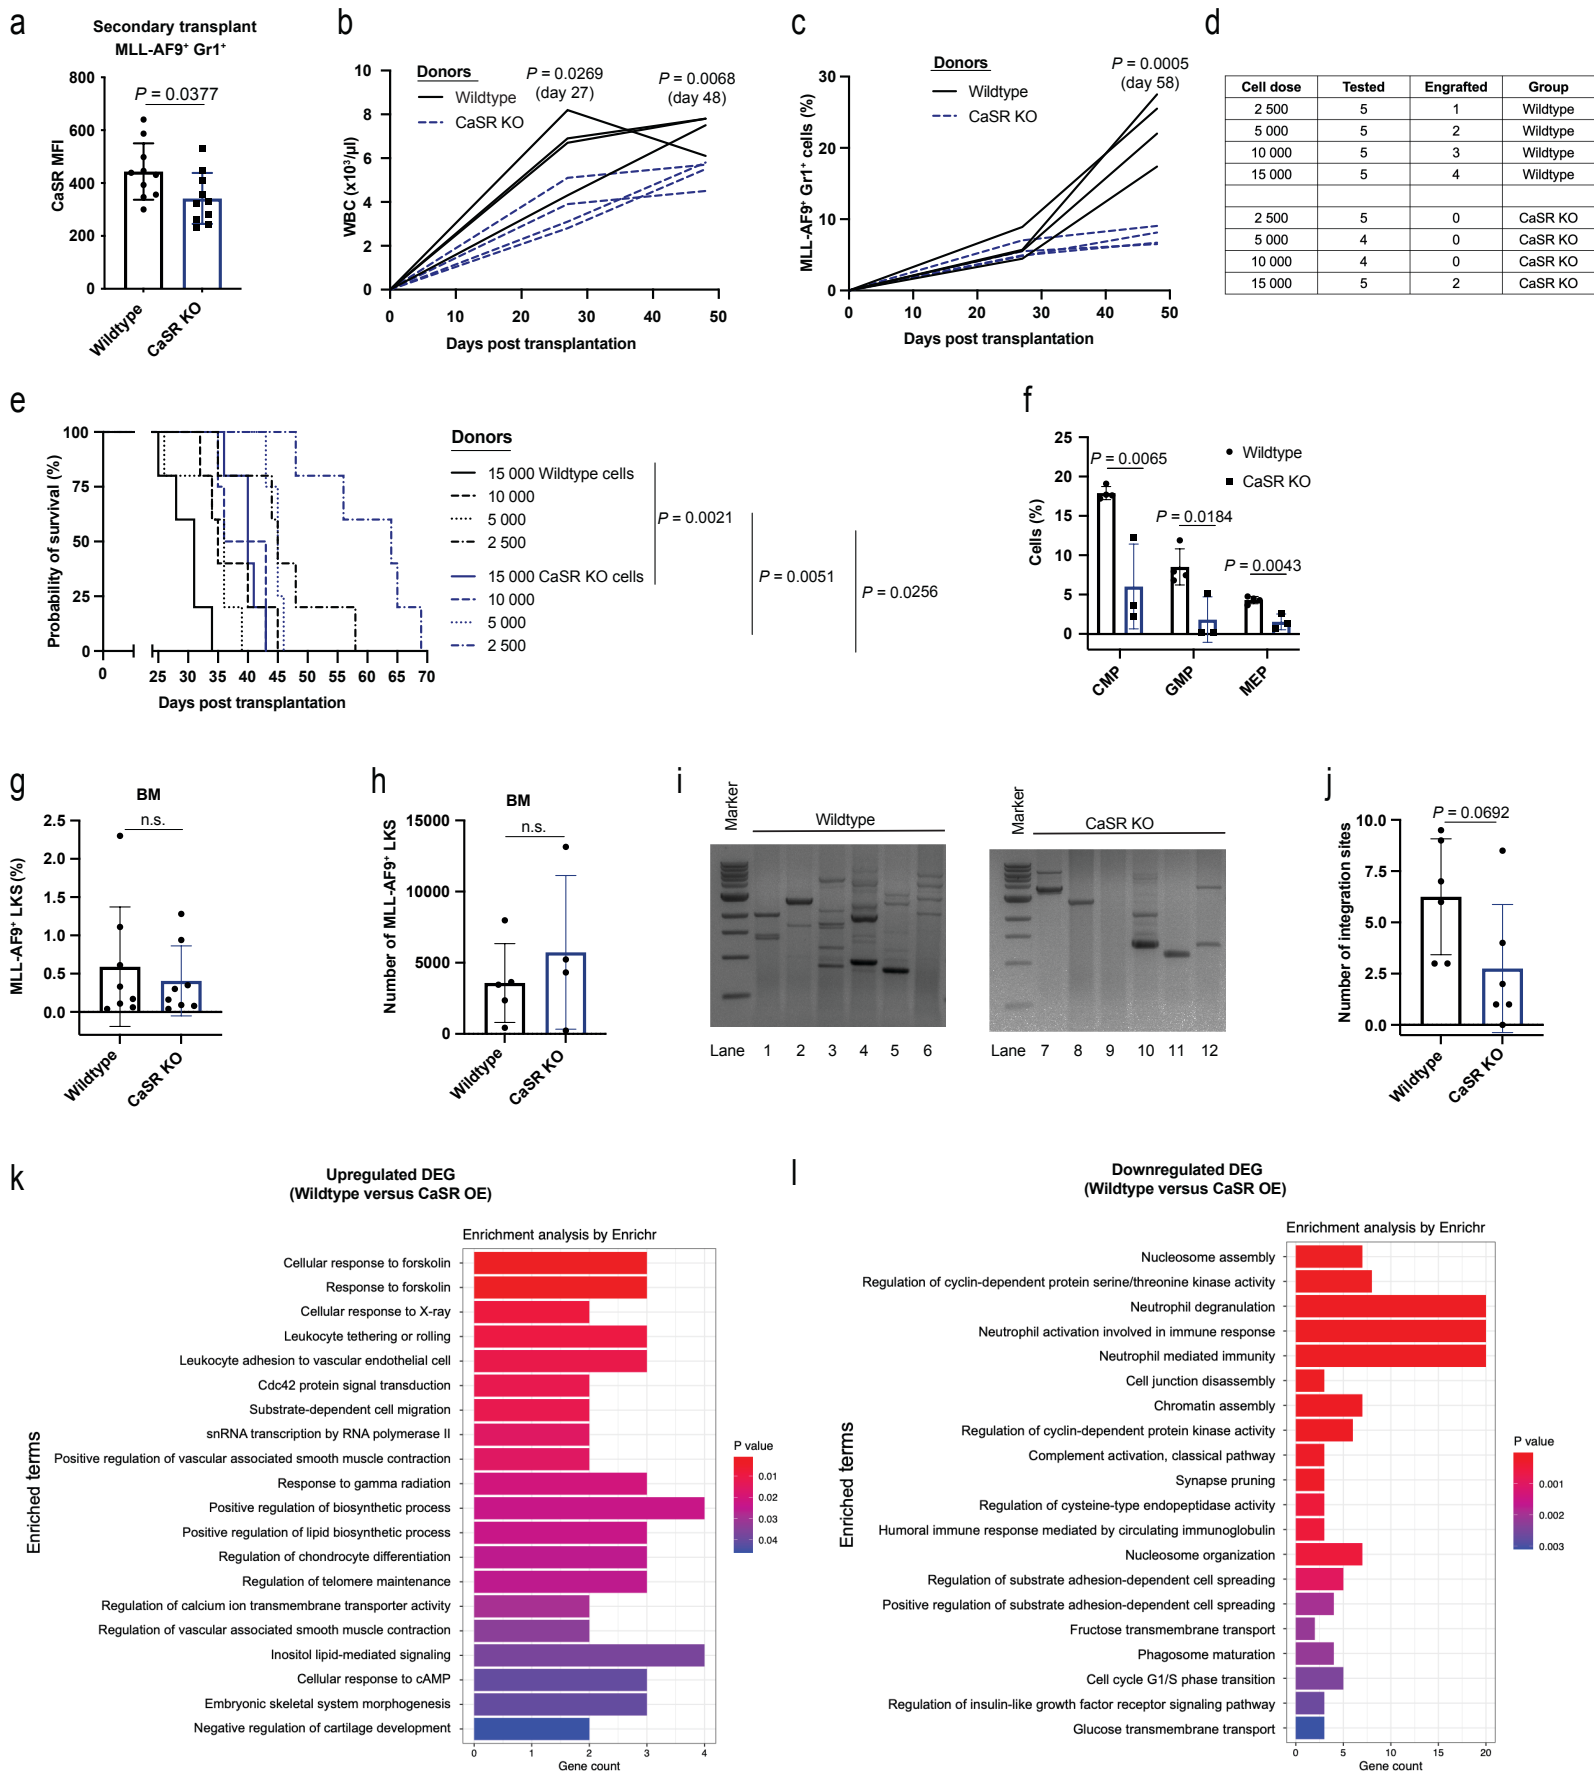

**Supplementary Figure 13.** **a**) Mean fluorescence intensity (MFI) of CaSR on MLL-AF9<sup>+</sup> Gr1<sup>+</sup> peripheral blood leukocytes of secondary recipient mice, transplanted with sorted wildtype or CaSR KO MLL-AF9<sup>+</sup> (GFP<sup>+</sup>) Lin<sup>-</sup> BM cells from primary mice with established MLL-AF9-induced AML on day 27 after secondary transplantation (n=10, two-tailed *t*-test). **b-c**) White blood cell count (WBC) (**b**) and percentage of MLL-AF9<sup>+</sup> (GFP<sup>+</sup>) Gr1<sup>+</sup> cells (**c**) in the peripheral blood of wildtype secondary recipient mice, transplanted with sorted wildtype or CaSR KO MLL-AF9<sup>+</sup> (GFP<sup>+</sup>) Lin<sup>-</sup> BM cells from mice with established MLL-AF9-induced AML (n=4, two-tailed *t*-test). **d**) Table summarizing the transplanted cell dose, the number of mice per group (tested), the number of mice engrafting, and the type of donor bone marrow (group) in a limiting dilution transplantation assay. Sorted MLL-AF9<sup>+</sup> (GFP<sup>+</sup>) Lin<sup>-</sup> BM cells were transplanted into recipient animals



at varying doses (2,500-15,000 cells per mouse) in addition to  $2 \times 10^6$  supporting BM cells. Leukaemia stem cell (LSC) frequency was determined by Extreme Limiting Dilution Analysis (ELDA). Donor cell non-engraftment was defined as the recipient mice having less than 8,000 leukocytes/ $\mu$ l and less than 20 % MLL-AF9<sup>+</sup> (GFP<sup>+</sup>) Gr1<sup>+</sup> cells of total leukocytes in PB on day 24 after secondary transplantation. **e**) Kaplan-Meier-style survival curves of wildtype (Mx1-Cre<sup>-/-</sup> CaSR<sup>fllox/fllox</sup>) secondary recipient mice transplanted with different doses of wildtype or CaSR KO (Mx1-Cre<sup>+/-</sup> CaSR<sup>fllox/fllox</sup>) sorted MLL-AF9<sup>+</sup> (GFP<sup>+</sup>) Lin<sup>-</sup> BM cells (2,500-15,000 cells per mouse) plus supporting BM as in **(d)** in a limiting-dilution transplantation assay (n=4-5, Log-rank test). **f**) Percentage of MLL-AF9<sup>+</sup> (GFP<sup>+</sup>) common myeloid progenitors (CMP: Lin<sup>-</sup> IL7R<sup>-</sup> c-Kit<sup>+</sup> Sca-1<sup>-</sup> CD16/32<sup>-</sup> CD34<sup>-</sup>), granulocyte monocyte progenitors (GMP: Lin<sup>-</sup> IL7R<sup>-</sup> c-Kit<sup>+</sup> Sca-1<sup>-</sup> CD16/32<sup>+</sup> CD34<sup>+</sup>) and megakaryocyte erythroid progenitors (MEP: Lin<sup>-</sup> IL7R<sup>-</sup> c-Kit<sup>+</sup> Sca-1<sup>-</sup> CD16/32<sup>-</sup> CD34<sup>+</sup>) cells in the BM of wildtype mice transplanted with MLL-AF9<sup>+</sup> wildtype or CaSR KO BM cells in the AML model on day 40 after transplantation (n=3-4, two-way ANOVA Sidak's test). 10 mg/kg of poly I:C was administered on days 3 to 6 after transplantation. **g-h**) Percentage of single cells **(g)** and absolute number **(h)** of Lin<sup>-</sup> c-Kit<sup>+</sup> Sca-1<sup>+</sup> (LKS) cells in the BM (one femur) of wildtype mice transplanted with wildtype (black) or CaSR KO (blue) MLL-AF9<sup>+</sup> leukaemia-initiating cells (LIC), determined on day 40 after transplantation (n=4-5, two-tailed *t*-test). 10 mg/kg of poly I:C was administered on days 3 to 6 after transplantation. **i-j**) Representative images of agarose gel electrophoresis **(i)** and its quantification **(j)** of the DNA products amplified by long-distance inverse (LDI) PCR, derived from splenic tissue of moribund wildtype mice which had been transplanted with wildtype (lanes 1-6; black) or CaSR KO (lanes 7-12; blue) MLL-AF9-transduced BM in the AML model (n=6, two-tailed *t*-test). **k-l**) Gene ontology (GO) analysis of significantly upregulated **(k)** or downregulated **(l)** genes in sorted MLL-AF9<sup>+</sup> (RFP<sup>+</sup>) Lin<sup>-</sup> cells from the BM of wildtype mice transplanted with wildtype MLL-AF9<sup>+</sup> LIC, co-transduced with CaSR-overexpressing or empty vector-expressing retrovirus in the AML model. The bar graph summarizes non-redundant terms with P-values provided by the colour coding.

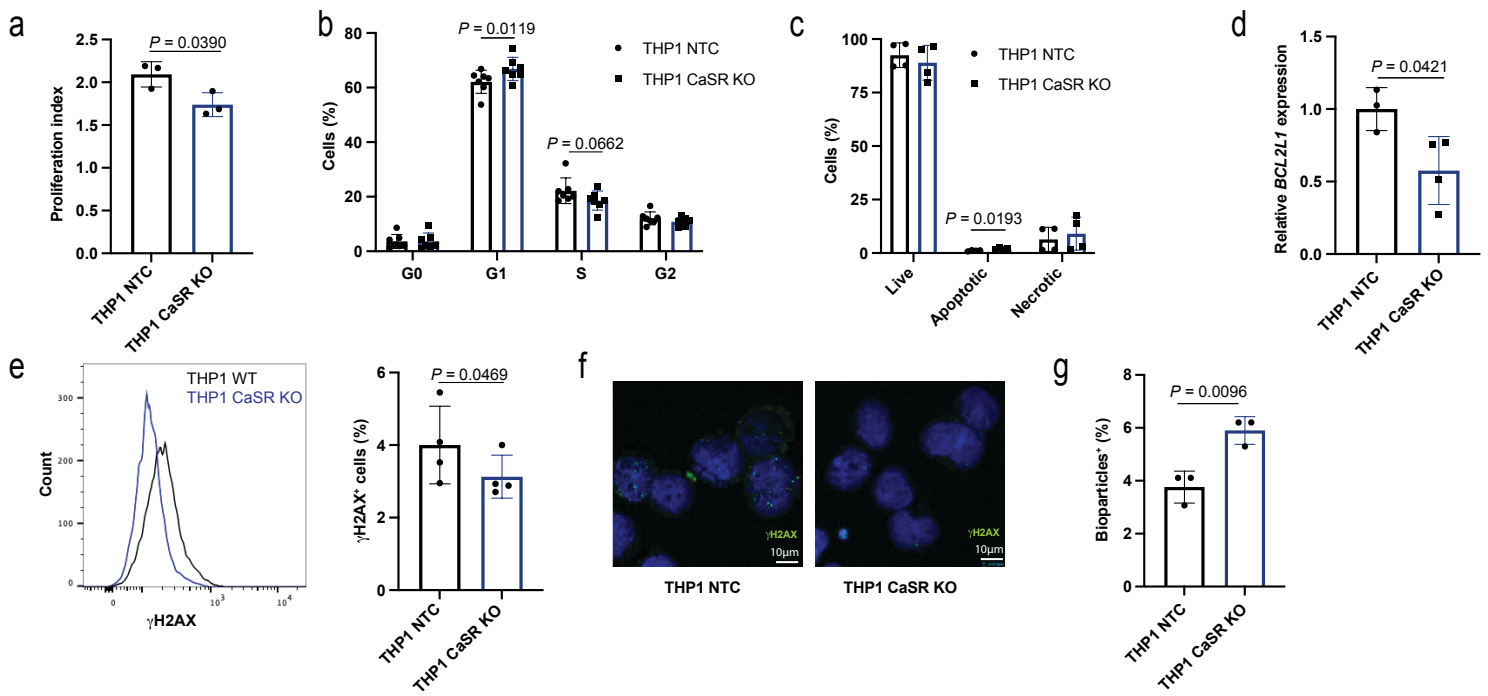

**Supplementary Figure 14.** **a**) Proliferation of non-target control (NTC) (black) or CaSR KO (blue) THP1 cells after 72 h of culture, assessed by carboxyfluorescein succinimidyl ester (CFSE) staining (n=3, two-tailed *t*-test). **b**) Cell cycle status of NTC (black) or CaSR KO (blue) THP1 cells by Ki67 and 4',6-diamidino-2-phenylindole (DAPI) staining (n=7, two-way ANOVA, Sidak's test). **c**) Percentage of live, apoptotic or necrotic NTC (black) or CaSR KO (blue) THP1 cells of single cells, detected by annexin V and DAPI staining (n=4, two-way ANOVA, Sidak's test). **d**) Relative expression of *BCL2L1* (BCL-XL) in NTC (black) or CaSR KO (blue) THP1 cells by RT-qPCR analysis (n=4, two-tailed *t*-test). Glyceraldehyde 3-phosphate dehydrogenase (*GAPDH*) was used as a housekeeping control. **e**) Representative histogram and percentage of  $\gamma$ H2AX<sup>+</sup> NTC (black) or CaSR KO (blue) THP1 cells of single cells, as tested by flow cytometry (n=4, two-tailed *t*-test). **f**) Immunofluorescence (IF) staining for  $\gamma$ H2AX (green) in NTC (left) or CaSR KO (right) THP1 cells. DNA double strand breaks (DSBs) were detected by staining with  $\gamma$ H2AX and AF-647 (foci shown in green). Nuclear staining by DAPI is shown in blue. The scale bar represents 10  $\mu$ m. **g**) Percentage of NTC (black) or CaSR KO (blue) THP1 cells of single cells, which have phagocytosed phycoerythrin (PE)-conjugated pHrodo *E. coli* bioparticles after an exposure of 90 minutes (n=3, two-tailed *t*-test).

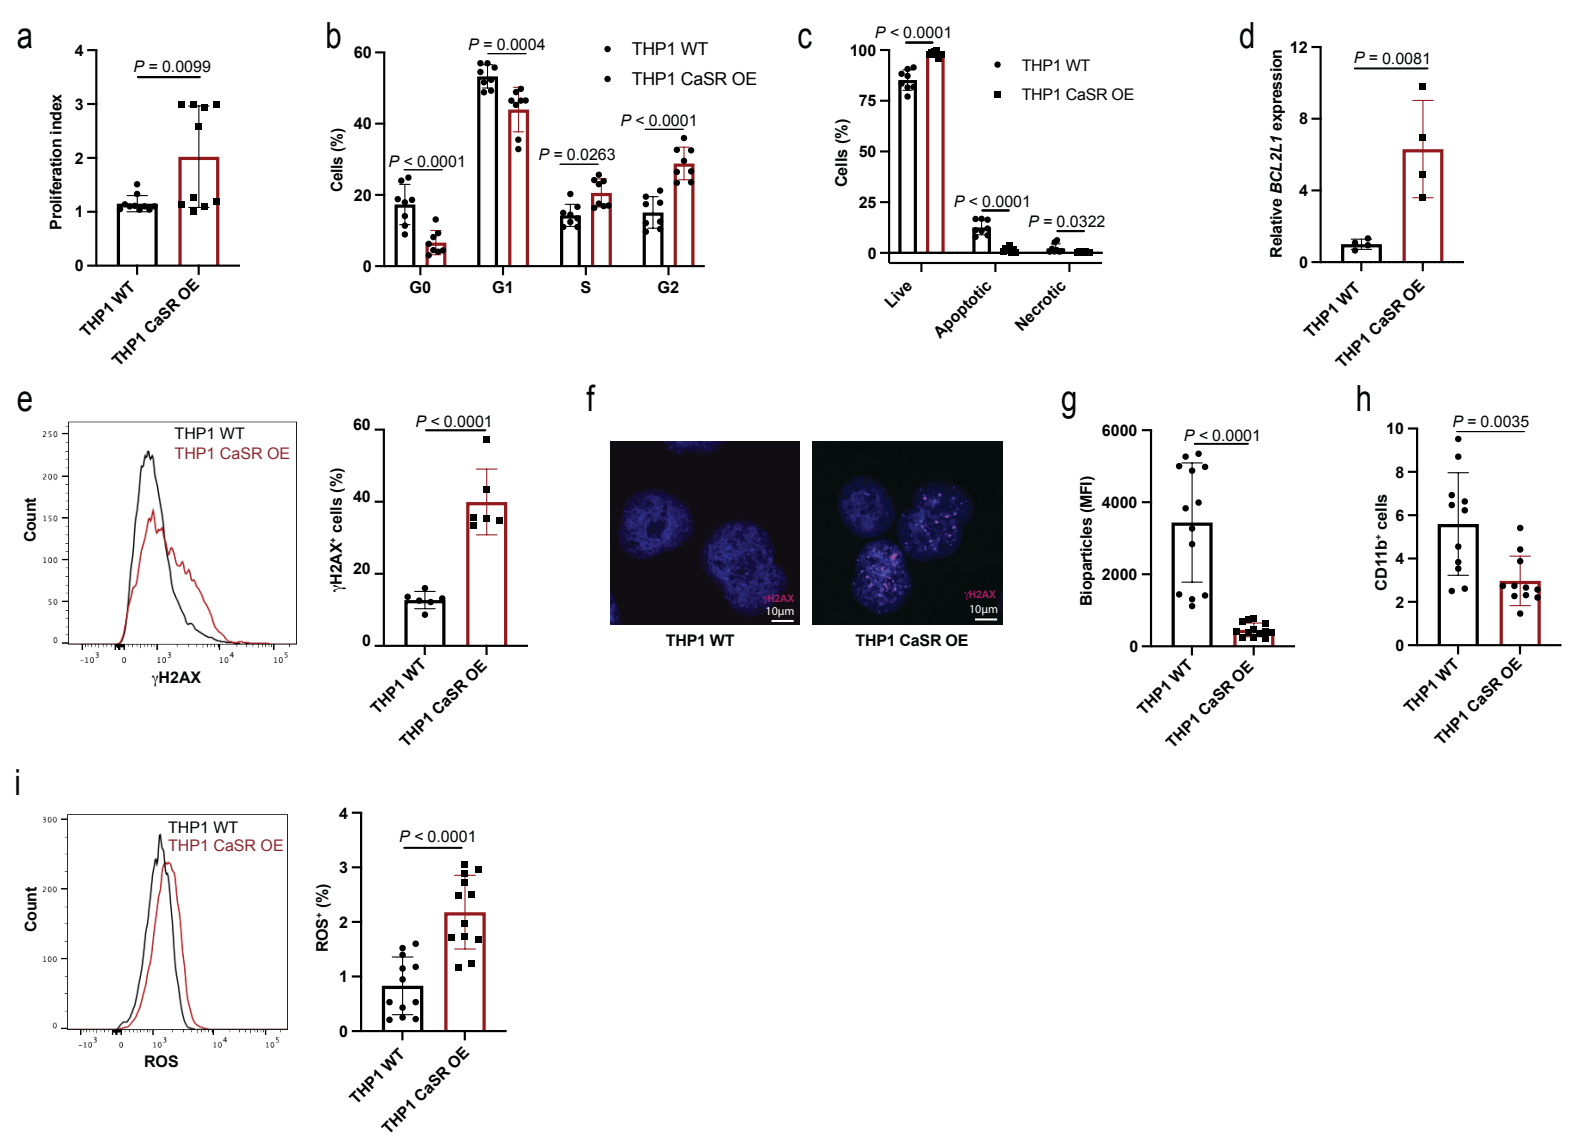

**Supplementary Figure 15.** a) Proliferation of WT (black) or CaSR overexpressing (OE) (red) THP1 cells after 72 h of culture, assessed by carboxyfluorescein succinimidyl ester (CFSE) staining (n=10, two-tailed *t*-test). b) Cell cycle status of wildtype (WT) (black) or CaSR OE (red) THP1 cells by Ki67 and 4',6-diamidino-2-phenylindole (DAPI) staining (n=8, two-way ANOVA, Sidak's test). c) Percentage of live, apoptotic or necrotic WT (black) or CaSR OE (red) THP1 cells detected by annexin V and DAPI staining (n=8, two-way ANOVA, Sidak's test). d) Relative expression of *BCL2L1* (BCL-XL) in WT (black) or CaSR OE (red) THP1 cells by RT-qPCR analysis (n=4, two-tailed *t*-test). Glyceraldehyde 3-phosphate dehydrogenase (*GAPDH*) was used as a housekeeping control. e) Representative histogram and percentage of  $\gamma$ H2AX<sup>+</sup> WT (black) or CaSR OE (red) THP1 cells of single cells, as tested by flow cytometry (n=6, two-tailed *t*-test). f) Immunofluorescence (IF) staining for  $\gamma$ H2AX (magenta) in WT (left) or CaSR OE (right) THP1 cells. DNA double strand breaks (DSBs) were detected by staining with  $\gamma$ H2AX and AF-647 (foci shown in magenta). Nuclear staining by DAPI is shown in blue. The scale bar represents 10  $\mu$ m. g) Percentage of WT (black) or CaSR OE (red) THP1 cells of single cells, which have phagocytosed phycoerythrin (PE)-conjugated pHrodo *E. coli* bioparticles after an exposure of 90 minutes (n=13, two-tailed *t*-test). h) Percentage of CD11b<sup>+</sup> cells of single cells on WT (black) or CaSR OE (red) THP1 cells (n=11, two-tailed *t*-test). i) Representative histogram and percentage of reactive oxygen species (ROS)<sup>+</sup> cells of all WT (black) versus CaSR OE (red) THP1 cells, as determined by flow cytometry (n=12, two-tailed *t*-test).

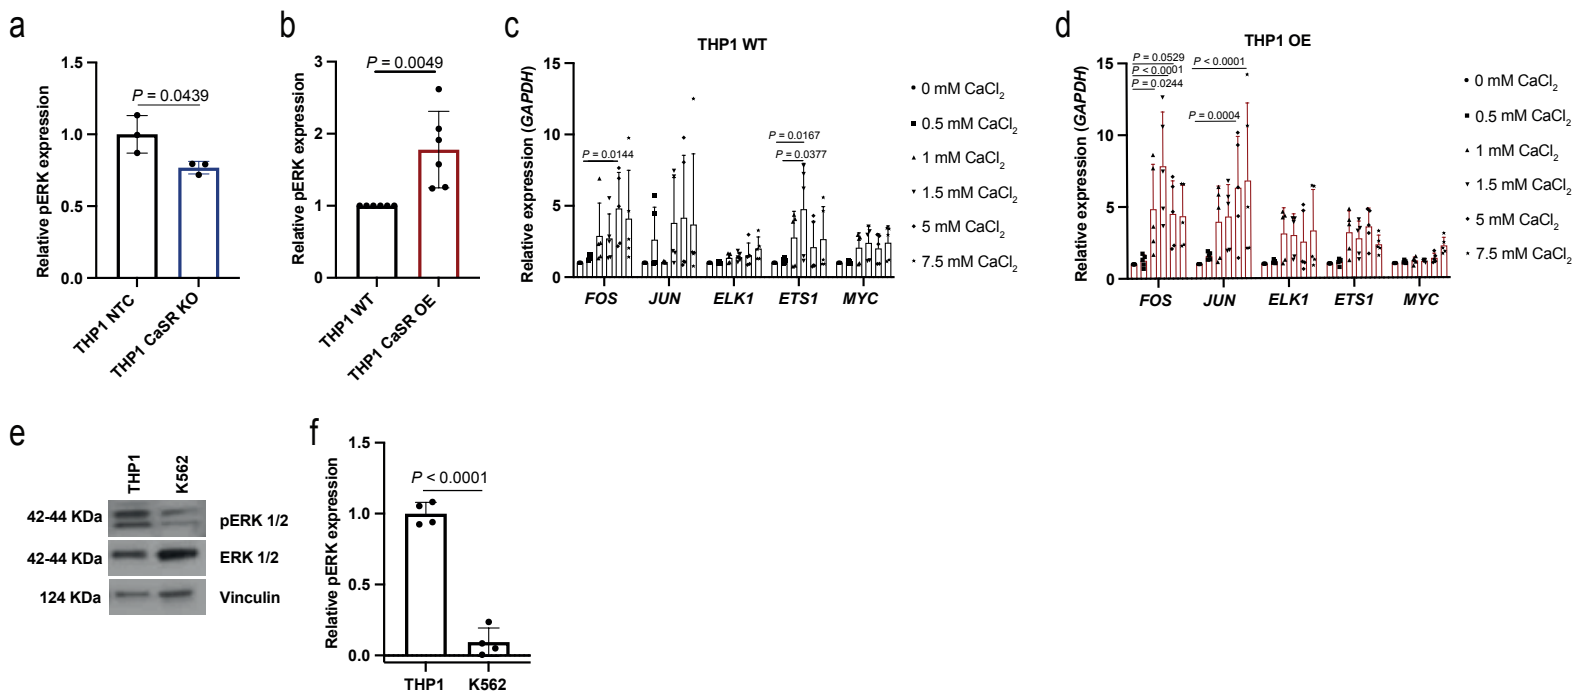

**Supplementary Figure 16.** **a**) Quantification of the band intensity of pERK1/2 in lysates of non-target control (NTC) versus CaSR KO THP1 cells, normalized by ERK1/2, in the immunoblot shown in Figure 4c (n=3, two-tailed *t*-test). **b**) Quantification of the band intensity of pERK1/2 in lysates of WT versus CaSR OE THP1 cells, normalized by ERK1/2, in the immunoblot shown in Figure 4D (n=6, two-tailed *t*-test). **c-d**) Relative expression of pERK 1/2 target genes, determined by RT-qPCR in THP1 WT (**c**) versus THP1 CaSR OE cells (**d**) after treatment with 0-7.5 mM of CaCl<sub>2</sub> for 4 h (n=5, ANOVA, Tukey test). Glyceraldehyde 3-phosphate dehydrogenase (*GAPDH*) was used as housekeeping gene. Fos proto-oncogene=*FOS*, Jun proto-oncogene=*JUN*, ETS transcription factor ELK1=*ELK1*, ETS proto-oncogene 1=*ETS1*, MYC proto-oncogene=*MYC*. **e-f**) Representative immunoblot (**e**) and its quantification (**f**) of pERK1/2 (42, 44 kDa), ERK1/2 (42, 44 kDa) and vinculin (124 kDa) expression in lysates of THP1 or K562 cells (n=4, two-tailed *t*-test). The blot is representative of four independent experiments.

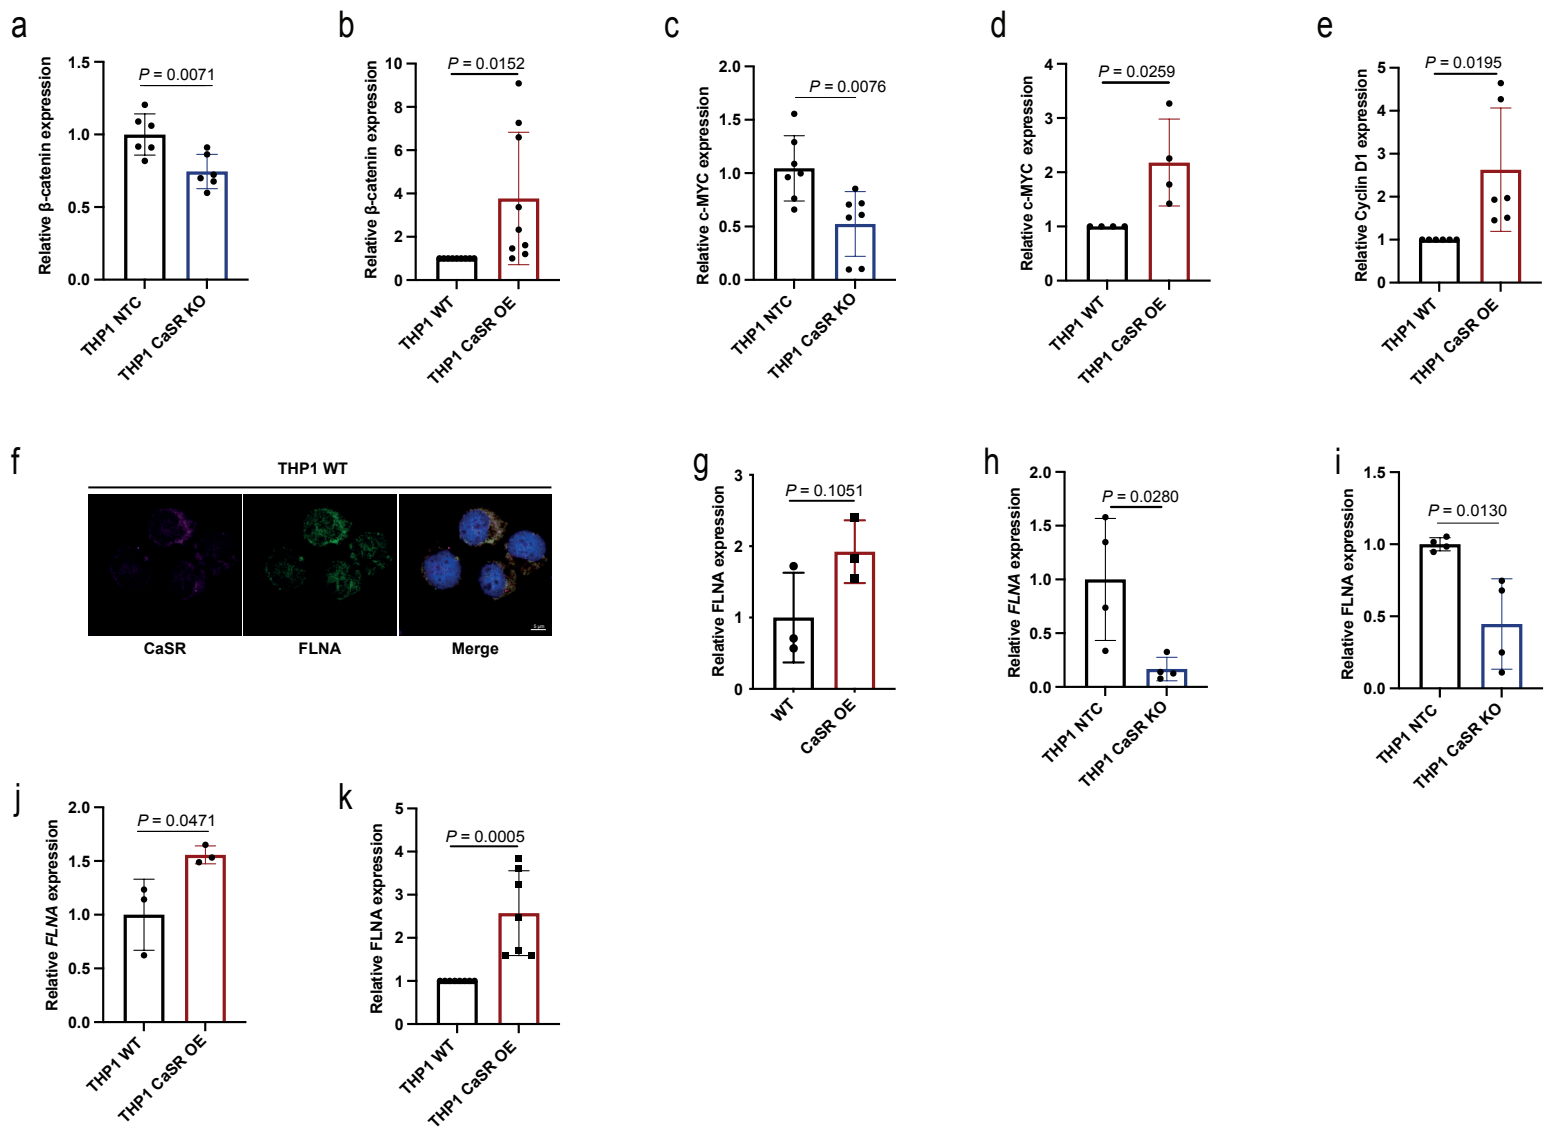

**Supplementary Figure 17.** **a**) Quantification of the band intensity of  $\beta$ -catenin in lysates of non-target control (NTC) versus CaSR KO THP1 cells, normalised by vinculin, in the immunoblot shown in Figure 4g ( $n=6$ , two-tailed  $t$ -test). **b**) Quantification of the band intensity of  $\beta$ -catenin in lysates of WT versus CaSR OE THP1 cells, normalised by GAPDH, in the immunoblot shown in Figure 4h ( $n=9$ , two-tailed  $t$ -test). **c**) Quantification of the band intensity of c-MYC in lysates of NTC versus CaSR KO THP1 cells, normalised by vinculin, in the immunoblot shown in Figure 4g ( $n=8$ , two-tailed  $t$ -test). **d**) Quantification of the band intensity of c-MYC in lysates of WT versus CaSR OE THP1 cells, normalised by GAPDH, in the immunoblot shown in Figure 4h ( $n=4$ , two-tailed  $t$ -test). **e**) Quantification of the band intensity of cyclin D1 in lysates of WT versus CaSR OE THP1 cells, normalised by GAPDH, in the immunoblot shown in Figure 4h ( $n=6$ , two-tailed  $t$ -test). **f**) Immunofluorescence (IF) staining for CaSR (magenta) and FLNA (green) in THP1 WT cells. Nuclear staining by DAPI is shown in blue. The images are representative of three independent experiments. The scale bar represents  $5 \mu\text{m}$ . **g**) Quantification of the band intensity of FLNA in lysates of wildtype versus CaSR OE BM cells, normalised by actin, in the immunoblot shown in Figure 5c ( $n=3$ , two-tailed  $t$ -test). **h**) Relative expression of *FLNA* in NTC versus CaSR KO THP1 cells, determined by RT-qPCR ( $n=4$ , two-tailed  $t$ -test). **i**) Quantification of the band intensity of FLNA in lysates of NTC versus CaSR KO THP1 cells, normalised by GAPDH, in the immunoblot shown in Figure 5d ( $n=4$ , two-tailed  $t$ -test). **j**) Relative expression of *FLNA* in WT versus CaSR OE THP1 cells, determined by RT-qPCR ( $n=4$ , two-tailed  $t$ -test). **k**) Quantification of the band intensity of FLNA in lysates of WT versus CaSR OE THP1 cells, normalised by GAPDH, in the immunoblot shown in Figure 5d ( $n=7$ , two-tailed  $t$ -test).

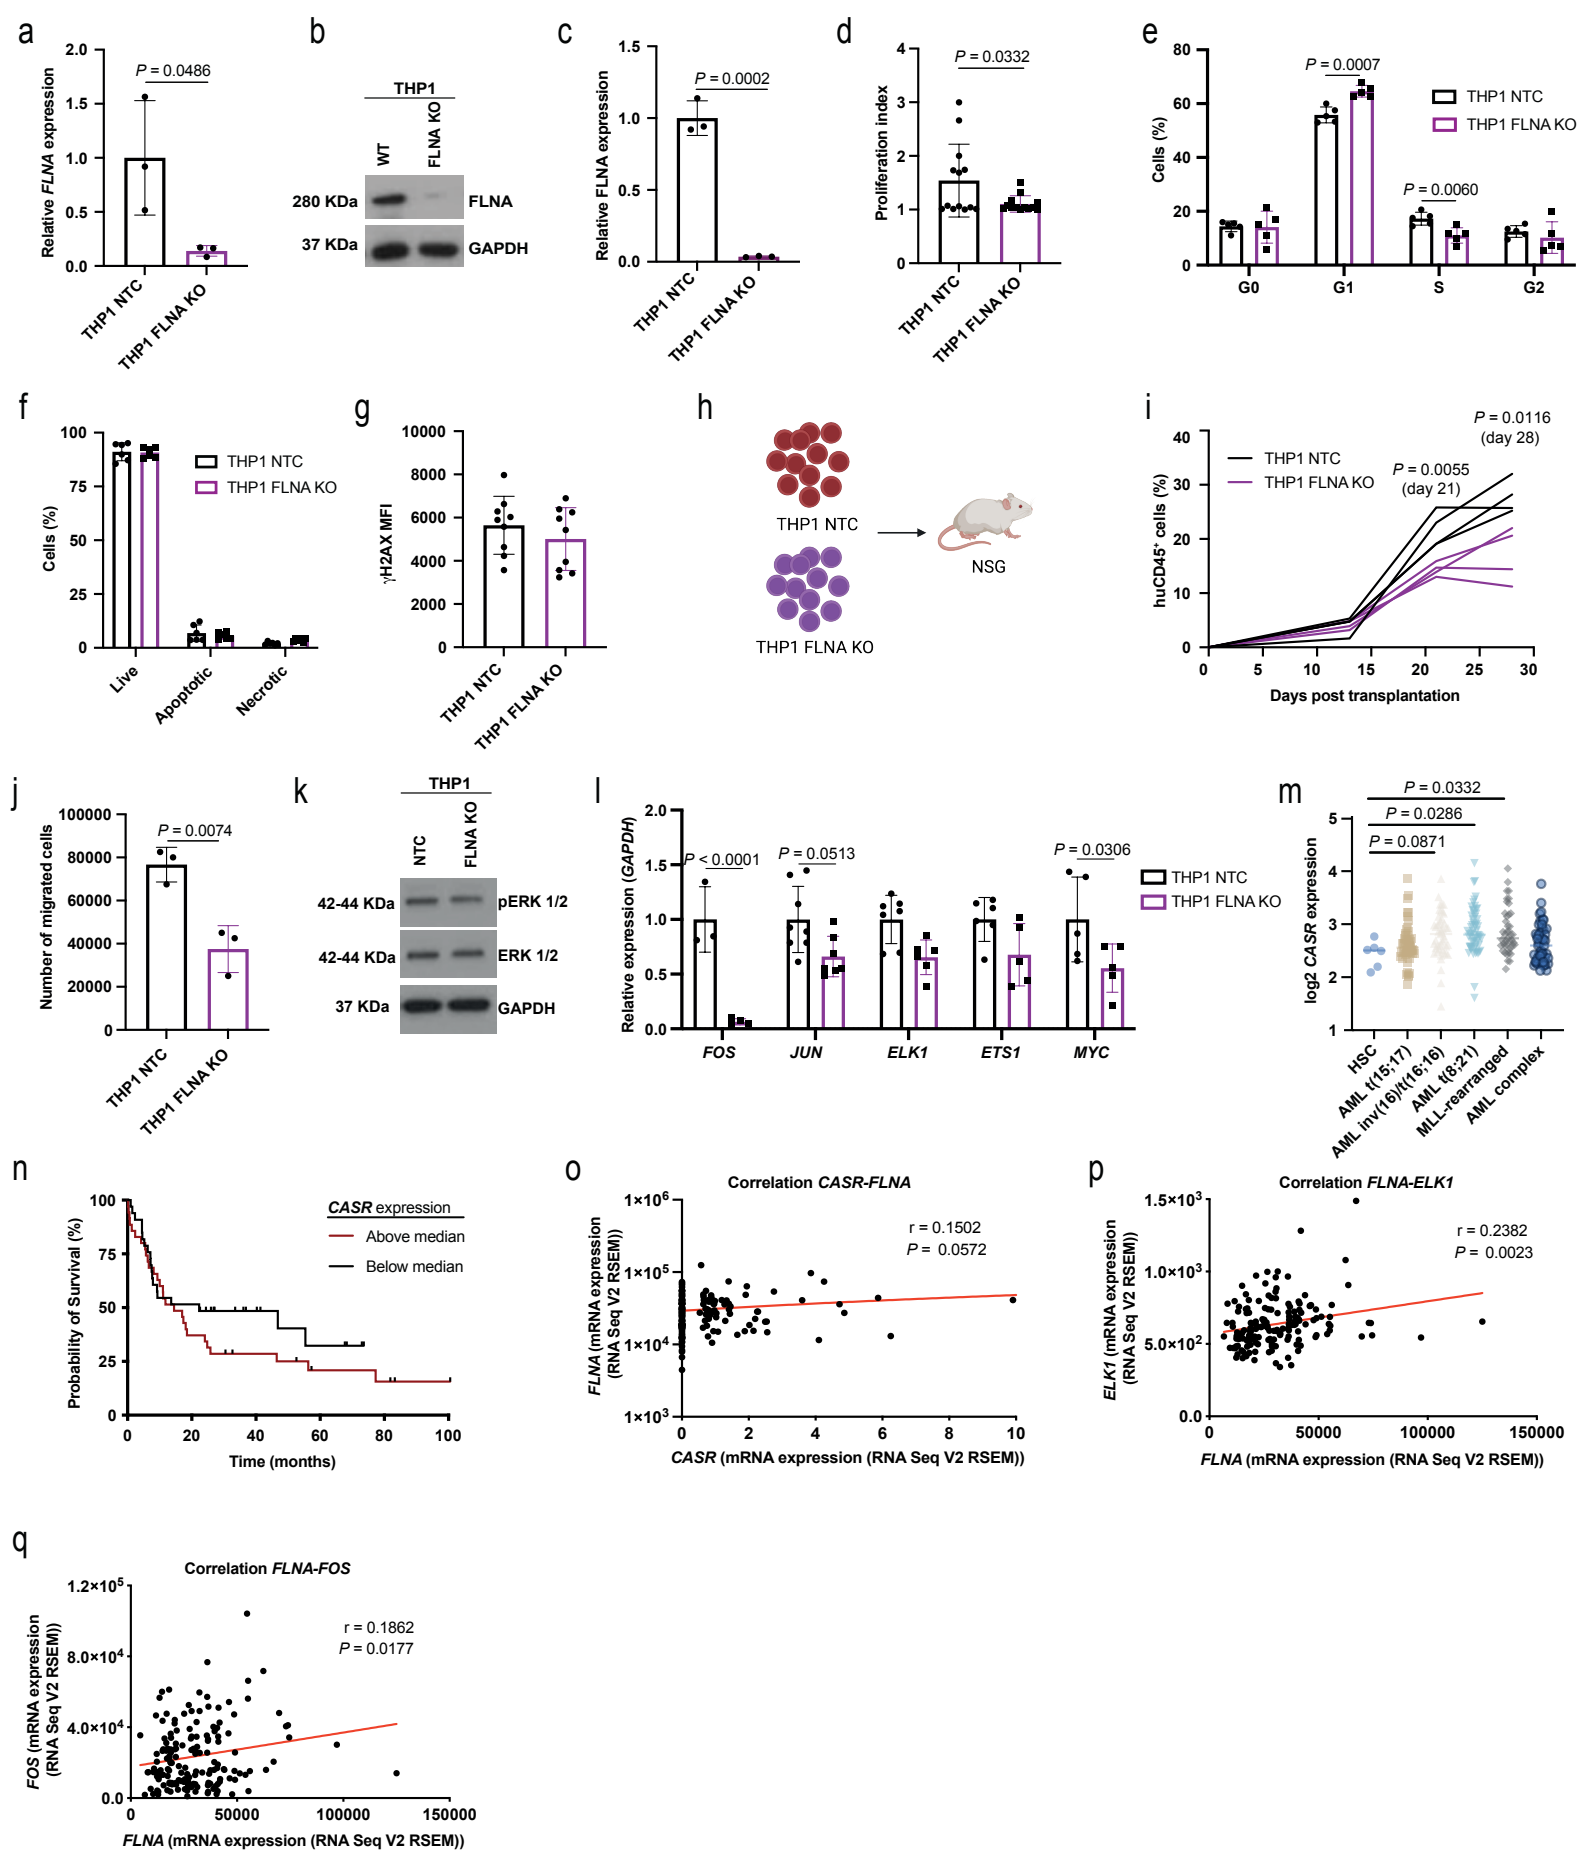

**Supplementary Figure 18.** **a**) Relative expression of *FLNA* in NTC (black) versus FLNA KO (purple) THP1 cells, determined by RT-qPCR ( $n=3$ , two-tailed *t*-test). **b-c**) Representative immunoblot (**b**) and its quantification (**c**) of FLNA (280 kDa) and GAPDH (37 kDa) expression in lysates of NTC versus FLNA KO THP1 cells ( $n=3$ , two-tailed *t*-test). **d**) Proliferation of NTC (black) or FLNA KO (purple) THP1 cells after 72 h of culture, assessed by carboxyfluorescein succinimidyl ester (CFSE) staining ( $n=13$ , two-tailed *t*-test). **e**) Cell cycle



status of NTC (black) or FLNA KO (purple) THP1 cells by Ki67 and 4',6-diamidino-2-phenylindole (DAPI) staining (n=5, two-way ANOVA, Sidak's test). **f**) Percentage of live, apoptotic or necrotic NTC (black) or FLNA KO (purple) THP1 cells detected by annexin V and DAPI staining (n=3, two-way ANOVA, Sidak's test). **g**) Mean fluorescence intensity (MFI) of  $\gamma$ H2AX in NTC (black) or FLNA KO (purple) THP1 cells of single cells, as tested by flow cytometry (n=9, two-tailed *t*-test). **h-i**) Transplantation scheme (**H**) and percentage of human CD45<sup>+</sup> leukocytes (**I**) in the peripheral blood of NOD SCID interleukin-2 receptor  $\gamma$  knockout (NSG) mice transplanted with  $1 \times 10^6$  NTC (black) or FLNA KO (purple) THP1 cells (n=8, two-tailed *t*-test). **j**) Number of NTC versus FLNA KO THP1 cells, which had migrated in a transwell (8  $\mu$ m pore size) towards C-X-C motif chemokine 12 (CXCL12) within 2 h (n=3, two-tailed *t*-test). **k**) Representative immunoblot of ERK1/2 (42, 44 kDa), phosphoERK1/2 (pERK1/2) and GAPDH expression in lysates of NTC versus FLNA KO THP1 cells. The blot is representative of five independent experiments. **l**) Relative expression of target genes downstream of pERK1/2 in NTC versus FLNA KO THP1 cells, as tested by RT-qPCR (n=3-8, two-way ANOVA, Sidak's test). Fos proto-oncogene=*FOS*, Jun proto-oncogene=*JUN*, ETS transcription factor ELK1=*ELK1*, ETS proto-oncogene 1=*ETS1*, MYC proto-oncogene=*MYC*. **m**) Log2 expression of *CASR* in HSC from healthy individuals (n=6) or in unsorted BM cells of patients with AML t(15;17) (n=54), AML inv(16)/t(16;16) (n=47), AML t(8;21) (n=60), MLL-rearranged (AML (t(11q23)/MLL)) (n=43) or AML with complex karyotype (n=46) (one-way ANOVA, Dunnett test), taken from the Bloodspot database. **n**) Kaplan-Meier-style survival of patients with AML with high (n=73) or low (n=100) expression of *CASR*. The curves were generated using the publicly available TCGA dataset (Log-rank test). **o-q**) Results of TCGA data analysis. Correlation of the mRNA levels of *CASR* and *FLNA* (**o**), *FLNA* and *ELK1* (**p**) (n=69) and *FLNA* and *FOS* (**q**) (n=162) in patients with AML using the data from the NEJM 2013 study, accessed via the cBioPortal. Pearson's correlation coefficient (r) and the P-value are shown.

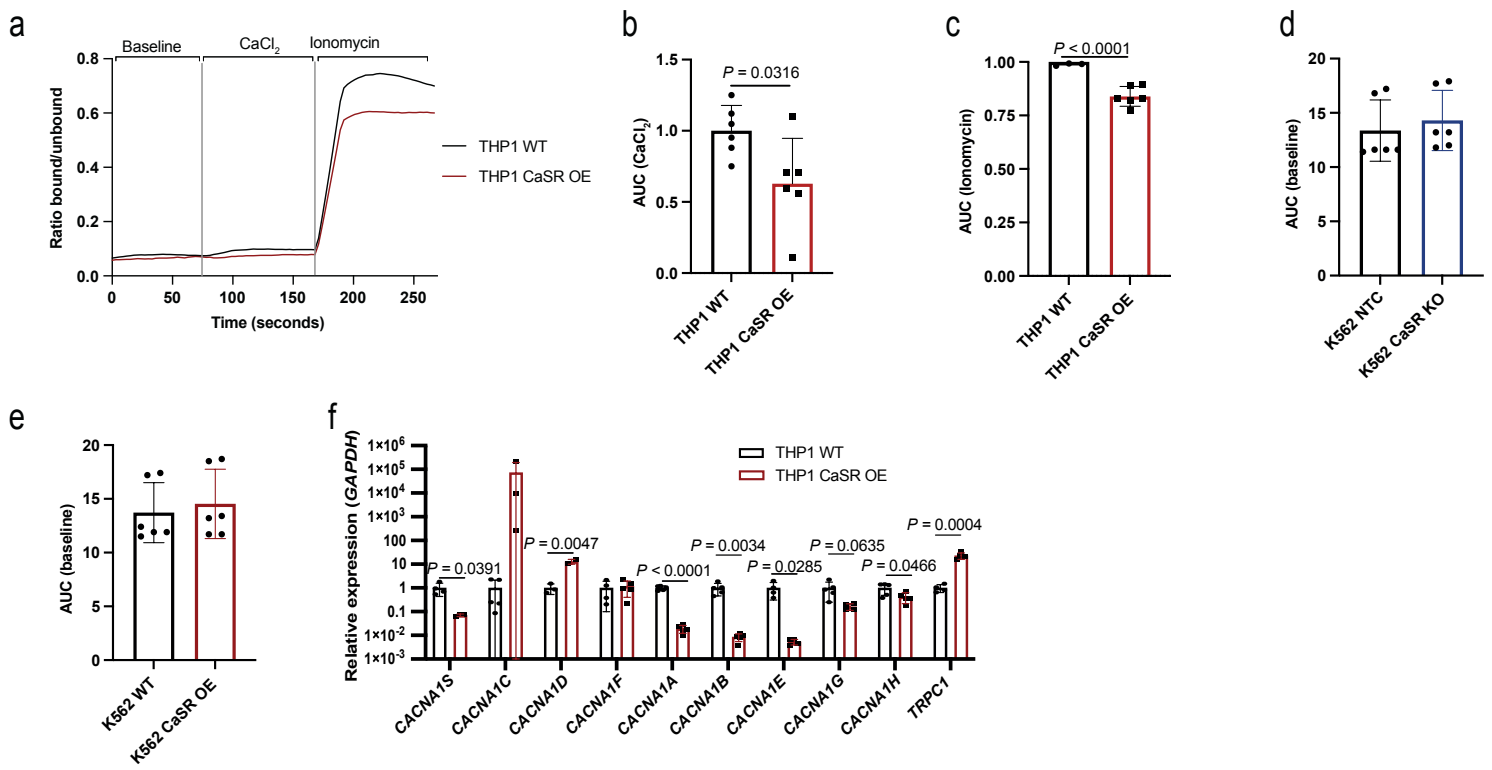

**Supplementary Figure 19.** **a**) Calcium flux analysis of THP1 wildtype (WT) (black) and THP1 CaSR -overexpressing (OE) cells (red) using indo-1 dye at baseline, after addition of CaCl<sub>2</sub> (5 mM) or ionomycin (1 μg/ml) (n=3). **b-c**) Calcium flux analysis represented by quantification of the area under the curve (AUC) after addition of 5 mM CaCl<sub>2</sub> (**b**) and after addition of ionomycin (1 μg/ml) (**c**) of THP1 WT (black) and THP1 CaSR OE cells (red) (n=6, two-tailed *t*-test). **d-e**) Calcium flux analysis represented by quantification of the area under the curve (AUC) at baseline in K562 non-target control (NTC) (black) versus CaSR knockout (KO) cells (blue) (**d**) and K562 WT (black) versus K562 CaSR-overexpressing (OE) cells (red) (**e**) (n=6, two-tailed *t*-test). **f**) Relative expression of various subunits (S, C, D, F, A, B, E, G, H) of calcium voltage-gated channels (*CACNA1*) and transient receptor potential cation channel subfamily C (*TRPC1*) in WT and CaSR OE THP1 cells by RT-qPCR analysis (n=3-5, two-way ANOVA, Sidak's test).

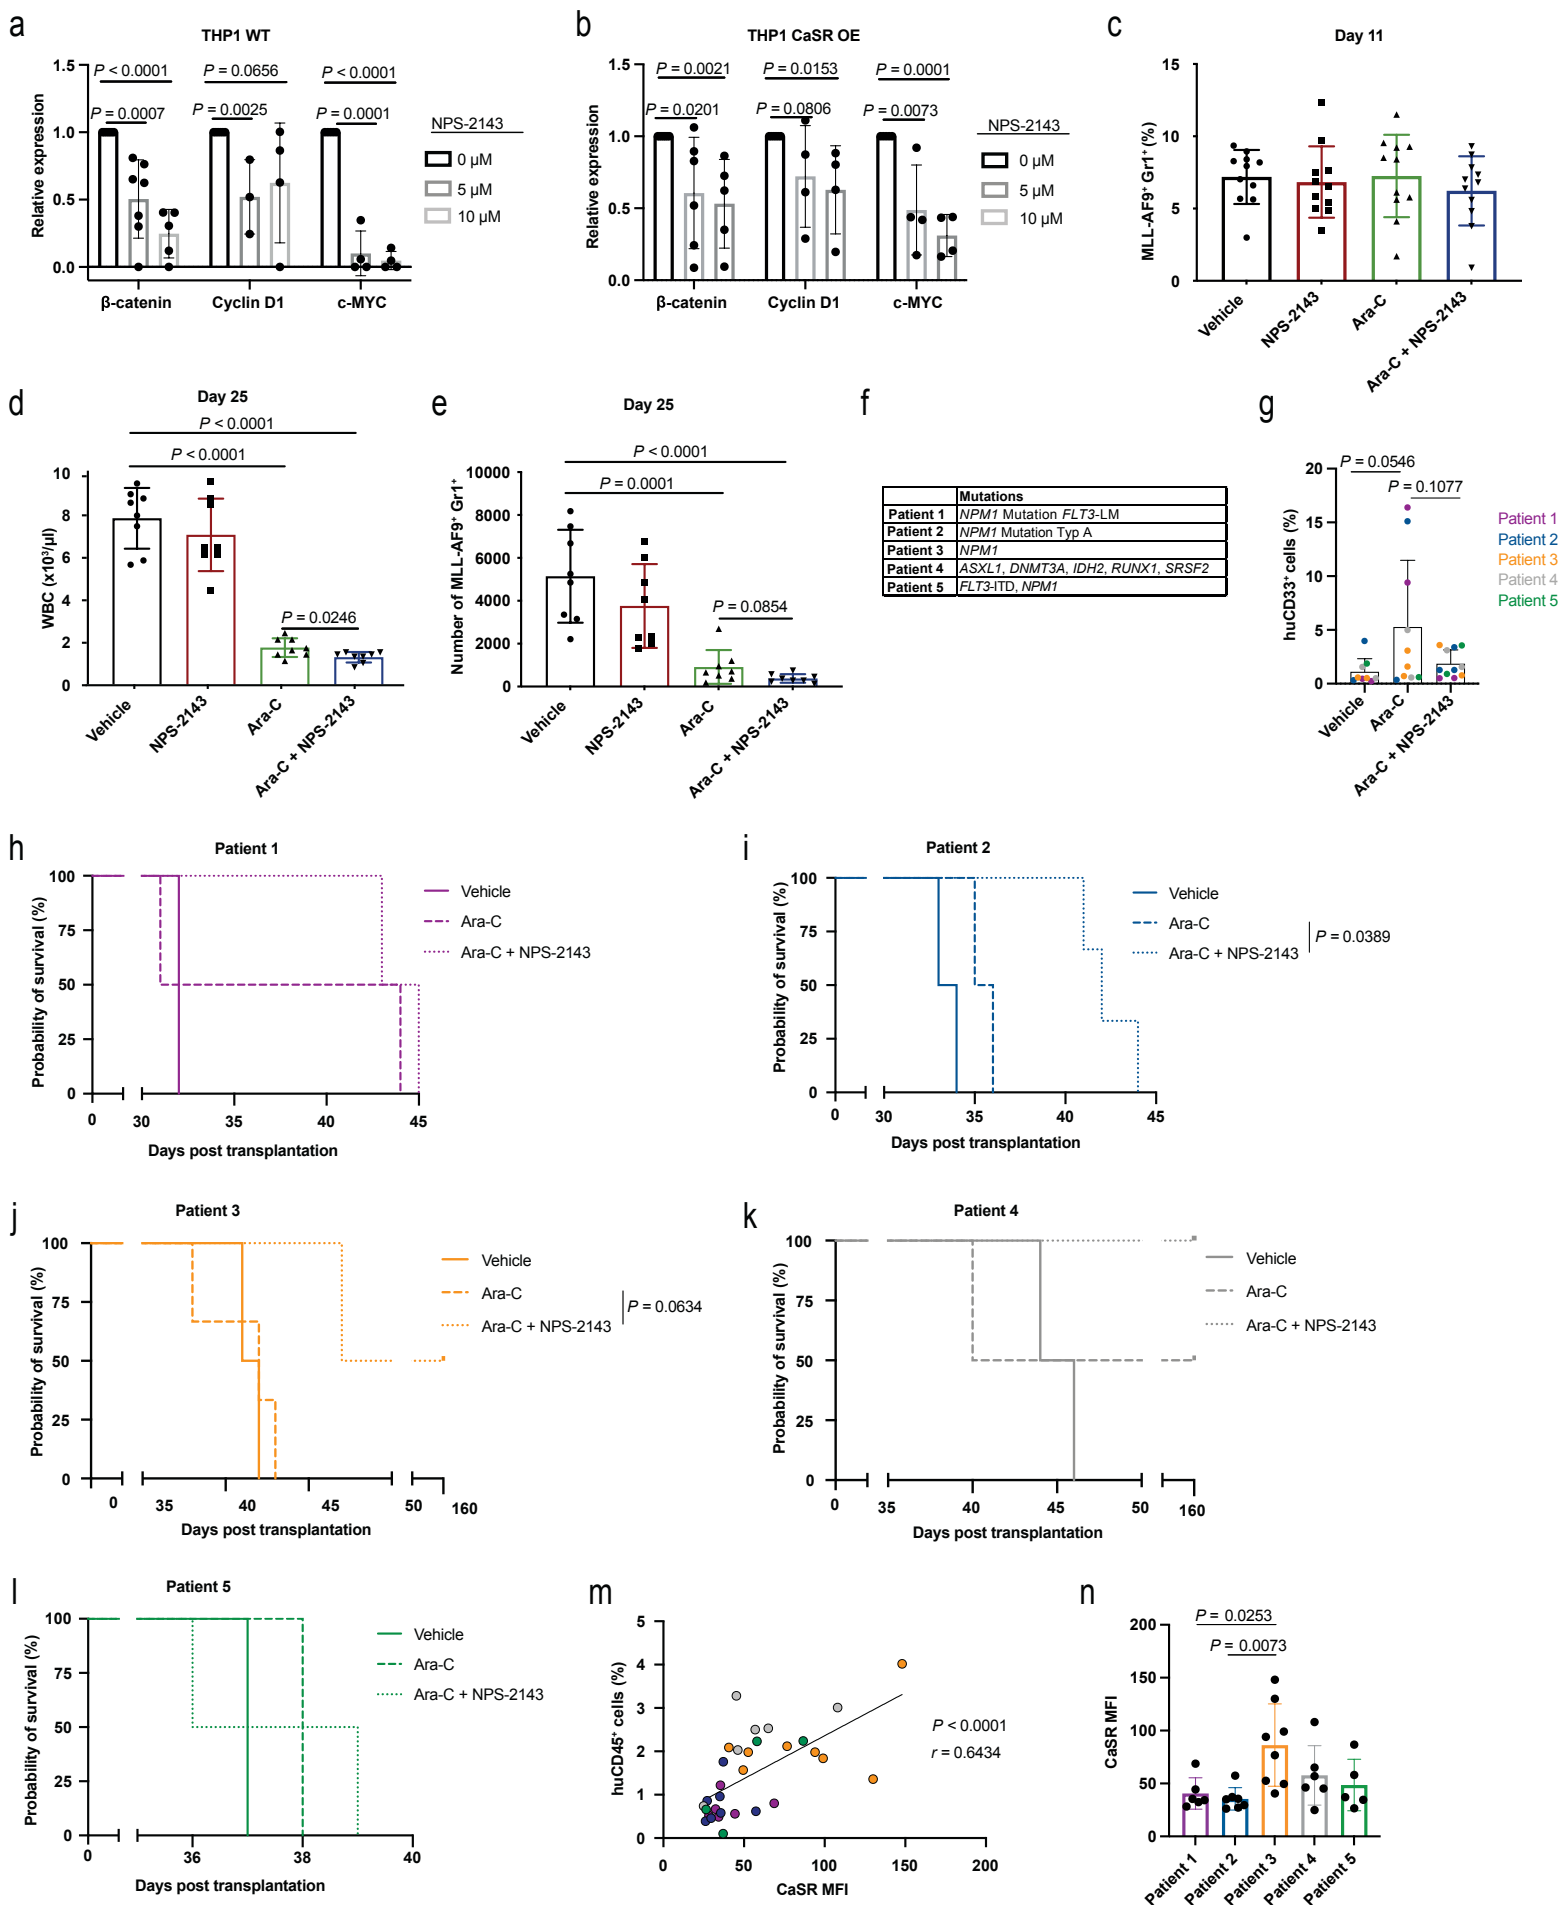

**Supplementary Figure 20. a-b)** Quantification of the band intensity of  $\beta$ -catenin, c-MYC and cyclin D1 in lysates of WT (a) versus CaSR OE (b) THP1 cells, normalised by GAPDH, in the immunoblots shown in Figure 5b-d ( $n=3-7$ , one-way ANOVA, Tukey test). **c)** Percentage of MLL-AF9<sup>+</sup> (GFP<sup>+</sup>) Gr1<sup>+</sup> cells of single cells in the peripheral blood of BALB/c mice with MLL-AF9-induced AML prior to treatment,

i.e. on day 11 after transplant (n=8, one-way ANOVA, Tukey test). **d-e**) White blood cell count (WBC) (**d**) and number of MLL-AF9<sup>+</sup> (GFP<sup>+</sup>) Gr1<sup>+</sup> cells per 15  $\mu$ l (**e**) in peripheral blood of BALB/c mice with MLL-AF9-induced AML 25 days after transplantation (n=8, one-way ANOVA, Tukey test). **f**) Genetic alterations of the AML patient samples used in the study. *NPM1*=Nucleophosmin 1, *FLT3*=Fms like tyrosine kinase 3, LM=length mutation, ITD=internal tandem duplication, *ASXL1*=ASXL (additional sex combs-like) transcriptional regulator 1, *DNMT3A*=DNA nucleotide methyltransferase 3A, *IDH1/2*=isocitrate dehydrogenase 1/2, *RUNX1*=Runt-related transcription factor 1, *SRSF2*=serine and arginine rich splicing factor 2. **g**) Percentage of human CD33<sup>+</sup> cells in peripheral blood of NOD SCID interleukin-2 receptor  $\gamma$  knockout (NSG) transplanted with  $2 \times 10^6$  human AML cells from 5 different patients (represented by different colours) and treated with vehicle (n=9), ara-C (n=10) (50 mg/kg, administered on three consecutive days per cycle, for three cycles every two weeks, starting on day 17 after transplantation) or the combination of ara-C and NPS-2143 (n=11) (2 mg/kg, administered from day 17 to day 47 after transplantation as a daily regimen), 30 days post transplantation. Recipients of the same human AML sample are indicated by the same colour (one-way ANOVA, Tukey test). **h-l**) Kaplan-Meier-style survival curves of NSG mice transplanted with human AML cells and treated with vehicle (solid line), ara-C (dashed line) or the combination of ara-C and NPS-2143 (dotted line) as in (**g**). Recipients of the same human AML sample are indicated by the same colour: Patient 1 in purple (**h**) (n=2), patient 2 in blue (**i**) (n=2-3), patient 3 in orange (**j**) (n=2-3), patient 4 in grey (**k**) (n=2) and patient 5 in green (**l**) (n=1-2) (Log-rank test). Only P-values for the comparison between ara-C versus ara-C + NPS-2143 are shown if they are significant or show a trend. The number of transplanted mice per cohort depended on the number of available AML cells. **m**) Correlation of human CD45<sup>+</sup> cells and median fluorescence intensity (MFI) of CaSR on peripheral blood leukocytes of NSG mice transplanted with human AML cells as in (**g**) 17 days after transplantation, before the initiation of treatment. Pearson's correlation coefficient (r) and P-value are shown. **n**) Mean fluorescence intensity (MFI) of CaSR on peripheral blood leukocytes of NSG mice transplanted with human AML cells, 17 days after transplantation.

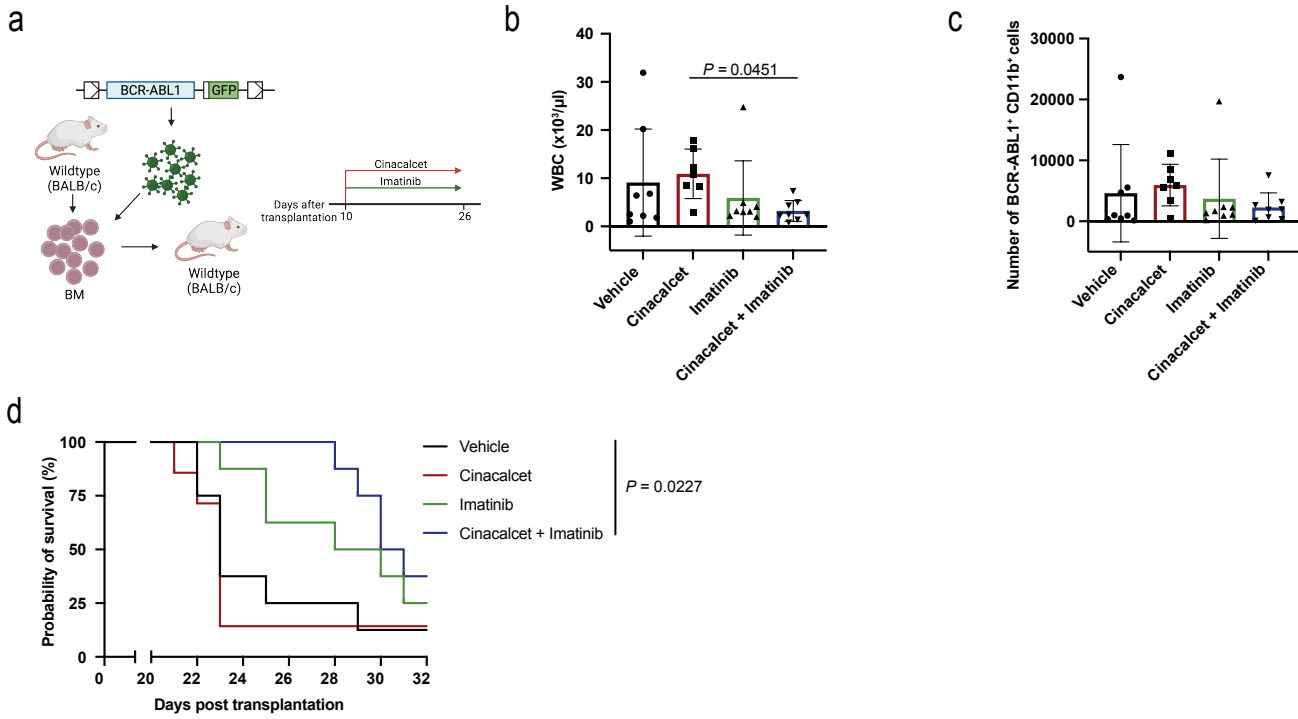

**Supplementary Figure 21.** **a**) Treatment scheme for BALB/c mice with BCR-ABL1-induced chronic myeloid leukemia (CML). Mice were randomly assigned to 4 cohorts prior to treatment and treated with vehicle (water), cinacalcet p.o (30 mg/kg administered as a daily regimen), imatinib p.o. (100 mg/kg administered as a daily regimen) or the combination of both cinacalcet and imatinib. Treatment started on day 10 and lasted until day 26 after transplantation. **b-c**) White blood cell count (WBC) (**b**) and number of BCR-ABL1<sup>+</sup> (GFP<sup>+</sup>) CD11b<sup>+</sup> cells/15  $\mu$ l (**c**) in peripheral blood of mice with BCR-ABL1-induced CML and treatment as in (**a**) on day 16 after transplantation (n=7-8, Kruskal-Wallis test, Dunns test). **d**) Kaplan-Meier-style survival curves of mice with CML treated with vehicle (black), cinacalcet (red), imatinib (green) or the combination of both cinacalcet and imatinib (blue) as in (**a**) (n=7-8, Log-rank test).

**Supplementary Table 1: Primers used in the generation of CaSR and GCaMP6S overexpression constructs**

| <b>Primer name</b> | <b>Primer sequence (3' → 5')</b>                  |
|--------------------|---------------------------------------------------|
| hCaSR.XhoI.F       | CAGATCTTCCGGATGGCTCGAGT                           |
| hCaSR.ApaI.R       | ATATATGGGCCACATCGATTTTCCATGGCAGCTG                |
| hCaSR.seq.1        | CTAAGCCTCCGCCTCCTCTTC                             |
| hCaSR.seq.2        | TGTGCCAGGTGAGTGCCAAG                              |
| hCaSR.seq.3        | CTTGATCTTTAGCTGCTACTCC                            |
| hCaSR.seq.4        | CTCACTGAGCTTTGATGAGCT                             |
| hCaSR.seq.5        | CAGGAGCTGGAGGATGAGAT                              |
| hCaSR.Sfi.F        | GGCCTCTGAGGCCACCATGGCATTATATAGCTGCTGCTGGGTCTCTT   |
| hCaSR.Sfi.R        | GGCCTGACAGGCCTTATGAATCACTACGTTTTCTGTAACAGTGCTGCCT |
| hCaSR.int.F        | CAAGATCTGGCTGGCTAGCGAGGCCT                        |
| hCaSR.int.R        | AGGCCTCGCTAGCCAGCCAGATCTT                         |
| hCaSR.SF1          | GTGGGAGCAACTGGCTCA                                |
| hCaSR.SF2          | TACCTGCTTACCTGGGAGAG                              |
| hCaSR.SF3          | GGGACCAGGAAAGGGATCAT                              |
| hCaSR.SF4          | CCTTTGGCATCAGCTTCGT                               |
| hCaSR.SF5          | GGAAGCTGCCGGAGAACTTC                              |

|               |                                             |
|---------------|---------------------------------------------|
| GCaMP6s.Sfi.F | GGCCTCTGAGGCCACCATGGGTTCTCATCATCATCATCATGGT |
| GCaMP6s.Sfi.R | GGCCTGACAGGCCTCACTTCGCTGTCATCATTTGTACAACTCT |
| GCaMP6s.SF1   | CCCAACGAGAAGCGCGATCA                        |
| GCaMP6s.SF2   | GCAGCACGACTTCTTCAAGTC                       |

**Supplementary Table 2: Flow cytometry antibodies used in the study.**

| Antibody            | Fluorochrome    | Clone   | Company           | Catalogue number | Dilution |
|---------------------|-----------------|---------|-------------------|------------------|----------|
| CaSR-Biotin         |                 | HL-1499 | NOVUS biologicals | #NB-1830         | 1:100    |
| CaSR                | Alexa Fluor 647 | 5C10    | NOVUS biologicals | #NB-120-19347    | 1:100    |
| CXCR4               | PE              | 2B11    | BD Biosciences    | #561734          | 1:100    |
| CD11b               | PE              | M1/70   | Biolegend         | #101207          | 1:100    |
| CD11b (Mac-1)       | APC             | M1/70   | BD Biosciences    | #553312          | 1:100    |
| BP-1 (CD249; Ly-51) | PE              | 6C3     | BD Biosciences    | #553735          | 1:100    |
| Ter119-Biotin       |                 |         | BD Biosciences    | #553672          | 1:100    |



|                                    |         |             |                |             |       |
|------------------------------------|---------|-------------|----------------|-------------|-------|
| Ly-6G and<br>Ly-6C (GR1)<br>Biotin |         | RB6-<br>8C5 | BD Biosciences | #553125     | 1:100 |
| Ly-6G and<br>Ly-6C (GR1)           | PE      | RB6-<br>8C5 | Invitrogen     | #12-5931-83 | 1:100 |
| LY-6G and<br>LY-6C (GR1)           | APC-Cy7 | RB6-<br>BC5 | BD Biosciences | #557661     | 1:100 |
| CD5-Biotin                         |         | 53-73       | BD Biosciences | #553019     | 1:100 |
| B220-Biotin                        |         | RA3-<br>6B2 | BD Biosciences | #553086     | 1:100 |
| F4/80-Biotin                       |         | BM8         | eBiosciences   | #13-4801-82 | 1:100 |
| CD117 (c-<br>Kit)                  | APC     | 2B8         | BD Biosciences | #553356     | 1:100 |
| CD117 (c-<br>Kit)                  | PE      | 2B8         | BD Biosciences | #553355     | 1:100 |
| CD117 (c-<br>Kit)                  | BV711   | 2B8         | Biolegend      | #105835     | 1:100 |
| Ly6A (Sca-1)                       | PE-Cy7  | D7          | Biolegend      | #108114     | 1:100 |
| Ly6A (Sca-1)                       | PerCP   | D7          | Biolegend      | #108122     | 1:100 |
| CD34                               | BV421   | RAM3<br>4   | BD Horizon     | #562608     | 1:100 |

|                                                                     |                     |           |                |             |        |
|---------------------------------------------------------------------|---------------------|-----------|----------------|-------------|--------|
| CD34                                                                | APC                 | RAM3<br>4 | eBiosciences   | #50-0341-82 | 1:100  |
| CD34                                                                | PE                  | RAM3<br>4 | BD Biosciences | #551387     | 1:100  |
| CD16/CD32<br>(FC $\gamma$ RII)                                      | V450                | 2.4G2     | BD Horizon     | #560539     | 1:100  |
| CD127<br>(IL7R)                                                     | BV711               | A7R34     | Biolegend      | #135035     | 1:100  |
| Human<br>CD33                                                       | PerCP<br>Cyanine5.5 | WM53      | BioLegend      | #303414     | 1:100  |
| Human<br>CD45                                                       | PE                  | HI30      | BD Biosciences | #555483     | 1:100  |
| Annexin V                                                           | APC                 |           | BioLegend      | #640920     | 1:100  |
| Ki-67                                                               | PE                  | 16A8      | BioLegend      | #151210     | 1:100  |
| Ki-67                                                               | APC                 | 16A8      | BioLegend      | #652406     | 1:100  |
| 4',6-<br>diamidino-2-<br>phenyl-indol-<br>dihydrochlori<br>d (DAPI) |                     |           | Sigma-Aldrich  | #D9542      | 1:1000 |
| CELLTrace<br>far red                                                |                     |           | Invitrogen     | #C34564     | 1:1000 |

|                                                     |                     |      |                              |                 |            |
|-----------------------------------------------------|---------------------|------|------------------------------|-----------------|------------|
| p-Histone<br>$\gamma$ H2A.X<br>rabbit mAb<br>(S139) |                     | 20E3 | Cell Signaling<br>Technology | #9718S          | 1:100      |
| Goat anti-<br>rabbit IgG<br>(H+L)                   | Alexa Fluor-<br>647 |      | Invitrogen                   | #A21244         | 1:100      |
| INDO-1 AM                                           |                     |      | Invitrogen                   | #65-0856-<br>39 | 1<br>:1000 |
| CELLROX<br>Deep red                                 |                     |      | Invitrogen                   | #C10422         | 2<br>50nM  |

**Supplementary Table 3: qPCR primers used in the study.**

| Primer name     | Primer sequence (3' → 5') | Species     |
|-----------------|---------------------------|-------------|
| <b>CASR_FW</b>  | GCAACCAGGAGCTGGAGGAT      | Mouse/human |
| <b>CASR_RV</b>  | CAGGCAGGTGTAGCCGATCA      | Mouse/human |
| <b>FLNA_FW</b>  | CATCAAGTACGGTGGTGACG      | Mouse/human |
| <b>FLNA_RV</b>  | ACATCCACCTCTGAGCCATC      | Mouse/human |
| <b>VDR_FW</b>   | CCAGTTCGTGTGAATGATGG      | Mouse/human |
| <b>VDR_RV</b>   | AGATTGGAGAAGCTGGACGA      | Mouse/human |
| <b>HOXA9_FW</b> | GGTTCTCCTCCAGTTGATAGAGA   | Mouse       |

|                  |                         |             |
|------------------|-------------------------|-------------|
| <b>HOXA9_RV</b>  | GAGCGAGCATGTAGCCAGTTG   | Mouse       |
| <b>MEIS1_FW</b>  | ACGGCATCCACTCGTTCA      | Mouse       |
| <b>MEIS1_RV</b>  | TGGCTGTCCATCAGGGTT      | Mouse       |
| <b>RUNX1_FW</b>  | GATGGCACTCTGGTCACCG     | Mouse       |
| <b>RUNX1_RV</b>  | GCCGCTCGGAAAAGGACAA     | Mouse       |
| <b>CREB_FW</b>   | AGCAGCTCATGCAACATCATC   | Mouse       |
| <b>CREB_RV</b>   | AGTCCTTACAGGAAGACTGAACT | Mouse       |
| <b>HOXB4_FW</b>  | CGTGAGCACGGTAAACCCC     | Mouse       |
| <b>HOXB4_RV</b>  | GTGTTGGGCAACTTGTGGTC    | Mouse       |
| <b>ALOX5_FW</b>  | CTACGATGTCACCGTGGATG    | Mouse       |
| <b>ALOX5_RV</b>  | GTGCTGCTTGAGGATGTGAA    | Mouse       |
| <b>EZH2_FW</b>   | GTGACCACAGGATAGGCATCT   | Mouse       |
| <b>EZH2_RV</b>   | CAAGGGATTTCCATTTCTCG    | Mouse       |
| <b>GATA-1_FW</b> | CCCACCTCTATCAGG GCCTA   | Mouse/human |
| <b>GATA-1_RV</b> | GAGGTTGTAGGCGAT CCCAG   | Mouse/human |
| <b>EVI1_FW</b>   | CTGGCTGCTGCTGATCTTAT    | Mouse/human |
| <b>EVI1_RV</b>   | AGTTCGCTTACCTCCGATTT    | Mouse/human |
| <b>MYC_FW</b>    | CCTGGTGCTCCATGAGGAGAC   | Human       |

|                    |                         |             |
|--------------------|-------------------------|-------------|
| <b>MYC_RV</b>      | CAGACTCTGACCTTTTGCCAGG  | Human       |
| <b>C-JUN_FW</b>    | ATCAAGGCGGAGAGGAAGCG    | Human       |
| <b>C-JUN_RV</b>    | TGAGCATGTTGGCCGTGGAC    | Human       |
| <b>C-FOS_FW</b>    | CTGGCGTTGTGAAGACCAT     | Human       |
| <b>C-FOS_RV</b>    | TCCCTTCGGATTCTCCTTTT    | Human       |
| <b>ETS_FW</b>      | GTGCTGTCAGGCGTTCT       | Human       |
| <b>ETS_RV</b>      | GGGAGAGGAGCAGACGAG      | Human       |
| <b>ELK1_FW</b>     | CGCAAGAACAAGACCAACATG   | Human       |
| <b>ELK1_RV</b>     | TCAGGGTAGGACACAACTTG    | Human       |
| <b>BCL-XL_FW</b>   | GGAGAACGGCGGCTGGGATA    | Human       |
| <b>BCL-XL_RV</b>   | GGCCACAGTCATGCCCGTCA    | Human       |
| <b>CACNA1-A_FW</b> | CTGGTAGCCTTTGCCTTCACTG  | Mouse/human |
| <b>CACNA1-A_RV</b> | ACACAGCCTTGAGCTTTGGCAG  | Mouse/human |
| <b>CACNA1-B_FW</b> | TGGACCTGGAAAGCCAAGCAGA  | Human       |
| <b>CACNA1-B_RV</b> | GGTCACGATGTAGTGGCAGAAG  | Human       |
| <b>CACNA1-C_FW</b> | GCAGGAGTACAAGAACTGTGAGC | Mouse/human |
| <b>CACNA1-C_RV</b> | CGAAGTAGGTGGAGTTGACCAC  | Mouse/human |
| <b>CACNA1-D_FW</b> | CTTCGACAACGTCCTCTCTGCT  | Human       |

|                    |                             |             |
|--------------------|-----------------------------|-------------|
| <b>CACNA1-D_RV</b> | GCCGATGTTCTCTCCATTGAG       | Human       |
| <b>CACNA1-E_FW</b> | AGCGTGAGACAGGCAAAGCCAT      | Human       |
| <b>CACNA1-E_RV</b> | GGATGCACATCTCAAAGTAGCGC     | Human       |
| <b>CACNA1-F_FW</b> | CCCTGATCGGCTTTCCTACCTAGATGA | Human       |
| <b>CACNA1-F_RV</b> | CAGGCACGTGCAGACAGGTGAA      | Human       |
| <b>CACNA1-G_FW</b> | TTCACCGCAGTCTTTCTGGCTG      | Human       |
| <b>CACNA1-G_RV</b> | TGACGGAGATGAGCACCAACAG      | Human       |
| <b>CACNA1-H_FW</b> | GGAACATCTCCACCAAGGCACA      | Human       |
| <b>CACNA1-H_RV</b> | TCCATCCTTGGATGACAGCACG      | Human       |
| <b>CACNA1-S_FW</b> | GACCACTCAGAGCCATCAACAG      | Human       |
| <b>CACNA1-S_RV</b> | GGTAGTGACCAGCACGATGTTC      | Human       |
| <b>TRPC4_FW</b>    | CCAAACTGCTGGTGGCAATGCT      | Human       |
| <b>TRPC4_RV</b>    | GGAATGATGTTGAAAGGTGGAGG     | Human       |
| <b>CXCL12_FW</b>   | CTCAAACTCCAAACTGTGCCC       | Human       |
| <b>CXCL12_RV</b>   | CTCCAGGTACTCCTGAATCCAC      | Human       |
| <b>GAPDH_FW</b>    | AGGTCGGTGTGAACGGATTTG       | Mouse/human |
| <b>GAPDH_RV</b>    | GGGGTCGTTGATGGCAACA         | Mouse/human |

**Supplementary Table 4: Primers used in the cloning of sgRNA constructs**

| Primer name  | Primer sequence (3' → 5') |
|--------------|---------------------------|
| hCaSR 1 s    | CACCGCTGTAACCAGCGAAACCCA  |
| hCaSR 1 as   | AAACTGGGTTTCGCTGGTTACAGC  |
| hFLNA ex2 s  | CACCGCCTGGCGGAGGACGCGCCG  |
| hFLNA ex2 as | AAACCGGCGCGTCCTCCGCCAGGC  |
| NTC s        | CACCGTTCCGGGCTAACAAGTCCT  |
| NTC as       | AAACAGGACTTGTTAGCCCGGAAC  |
| LKO.1        | GACTATCATATGCTTACCGT      |

**Supplementary Table 5: Western Blotting antibodies used in the study.**

| Antibody  |                  | Company                   | Catalogue number | Dilution |
|-----------|------------------|---------------------------|------------------|----------|
| GAPDH     | Mouse monoclonal | Santa Cruz Biotechnology  | #Sc-32233        | 1:1000   |
| CaSR      | Mouse monoclonal | Santa Cruz Biotechnology  | #Sc-47741        | 1:400    |
| Filamin-1 | Mouse monoclonal | Santa Cruz Biotechnology  | #Sc-17749        | 1:500    |
| Filamin A | Rabbit Ab        | Cell Signaling Technology | #4762S           | 1:1000   |
| ERK1/2    | Mouse monoclonal | Santa Cruz Biotechnology  | #Sc-514302       | 1:500    |
| p-ERK     | Mouse monoclonal | Santa Cruz Biotechnology  | #Sc-7383         | 1:500    |
| Cyclin D1 | Rabbit Ab        | Cell Signaling Technology | #E3P5S           | 1:800    |

|                               |                       |                           |          |        |
|-------------------------------|-----------------------|---------------------------|----------|--------|
| $\beta$ -catenin              | Rabbit polyclonal IgG | EMD Millipore Corp, Merck | #2942488 | 1:1000 |
| c-Myc                         | Rabbit mAb            | Cell Signaling Technology | #E5Q6W   | 1:800  |
| CXCR4                         | Rabbit polyclonal     | Invitrogen                | #PA3-305 | 1:1000 |
| anti-mouse IgG HRP-linked ab  |                       | Cell Signaling Technology | #34      | 1:5000 |
| anti-rabbit IgG HRP-linked ab |                       | Cell Signaling Technology | #29      | 1:5000 |

**Supplementary Table 6: Immunofluorescence antibodies used in the study.**

| Antibody  |           | Company                   | Catalogue number | Dilution |
|-----------|-----------|---------------------------|------------------|----------|
| CaSR      | Mouse Ab  | Abcam                     | #GR3309582-6     | 1:50     |
| Filamin-1 | Mouse Ab  | Santa Cruz Biotechnology  | #Sc-17749        | 1:25     |
| Filamin A | Rabbit Ab | Cell Signaling Technology | #4762S           | 1:50     |



|                                       |                               |                              |         |       |
|---------------------------------------|-------------------------------|------------------------------|---------|-------|
| p-histone<br>$\gamma$ H2A.X<br>(S139) | Rabbit Ab                     | Cell Signaling<br>Technology | #9718S  | 1:100 |
| Alexa fluor<br>488                    | Goat anti-mouse<br>IgG (H+L)  | Invitrogen                   | #A11029 | 1:400 |
| Alexa fluor<br>plus 647               | Goat anti-mouse<br>IgG (H+L)  | Invitrogen                   | #A32728 | 1:400 |
| Alexa fluor<br>647                    | Goat anti-rabbit<br>IgG (H+L) | Invitrogen                   | #A21244 | 1:400 |

**Supplementary Table 7: Patient samples used in the study.**

|                  | <b>Diagnosis</b> | <b>Subtype<br/>(FAB)</b> | <b>Initial<br/>diagnosis</b> | <b>Treatment</b> | <b>Source</b> |
|------------------|------------------|--------------------------|------------------------------|------------------|---------------|
| <b>Patient 1</b> | AML              | M2                       | Yes                          | No               | BM            |
| <b>Patient 2</b> | AML              | M4                       | Yes                          | No               | BM            |
| <b>Patient 3</b> | AML              |                          | Yes                          | No               | BM            |
| <b>Patient 4</b> | AML              | M4                       | Yes                          | No               | BM            |
| <b>Patient 5</b> | AML              |                          | Yes                          | No               | BM            |
